1 **Development and application of aerobic, chemically defined**  
2 **media for *Dysgonomonas***

3

4 Charles M. Bridges, Daniel J. Gage

5

6 Department of Molecular and Cell Biology, University of Connecticut, Storrs, CT, USA

7

8 **Corresponding author:**

9 Dr. Daniel J. Gage

10 Department of Molecular & Cell Biology

11 University of Connecticut

12 91 N. Eagleville Rd. Storrs, CT 06269-3125

13 [daniel.gage@uconn.edu](mailto:daniel.gage@uconn.edu)

14 (860) 486-3092

15

16 **ORCID information:**

17 Charles M. Bridges: <https://orcid.org/0000-0002-9527-2476>

18 Daniel J. Gage: <https://orcid.org/0000-0002-3207-7163>

19

20 **Running head:**

21 *Dysgonomonas* defined media

22

## 23 **Impact Statement**

24 Members of the genus *Dysgonomonas* are increasingly prevalent in ecological, medical and  
25 biotechnological contexts. To the best of our knowledge, there are currently no formulations for  
26 chemically defined or minimal media for *Dysgonomonas*, and limited complex formulations that  
27 allow aerobic growth, particularly on solid media. We have created three parallel media  
28 formulations (complex, defined & minimal) that permit robust aerobic and anaerobic growth in  
29 liquid and agar-solidified media. These formulations remove the necessity for animal blood and  
30 expensive equipment such as anaerobic chambers, which can inhibit basic research by groups with  
31 biosafety and resource limitations.

## 32 **Abstract**

33 Members of *Dysgonomonas* are Gram-negative, non-motile, facultatively anaerobic coccobacilli  
34 originally described in relation to their isolation stool and wounds of human patients (CDC group  
35 DF-3). More recently *Dysgonomonas* have been found to be widely distributed in terrestrial  
36 environments and are particularly enriched in insect systems. Their prevalence in xylophagous  
37 insects such as termites and wood-feeding cockroaches, as well as in soil-fed microbial fuel cells,  
38 elicit interest in lignocellulose degradation and biofuel production, respectively. Their prevalence  
39 in mosquito and fruit fly have implications relating to symbiosis, host immunology and  
40 developmental biology. Additionally, their prevalence in termite, mosquito and nematode present  
41 novel opportunities for pest and vector control. Currently, the absolute growth requirements of  
42 *Dysgonomonas* are unknown, and they are cultured solely under anaerobic conditions on complex  
43 media containing blood, peptones, tryptones, and yeast, plant or meat extracts. Restrictive &  
44 undefined culturing conditions preclude physiological and genetic studies, and thus further  
45 understanding of metabolic potential. Here we describe the requirements for growth of termite-  
46 derived *Dysgonomonas* isolates and create parallel defined, minimal and complex media that  
47 permit vigorous and reliable aerobic growth. Furthermore, we show that these media can be used  
48 to easily enrich for *Dysgonomonas* isolates from complex and microbially-diverse environmental  
49 samples.

## 50 **Keywords**

51 *Dysgonomonas*, termite, defined media, minimal media, L-cysteine, hemin

## 52 **Introduction**

53 Members of the genus *Dysgonomonas* (family *Dysgonomonadaceae* [1]) once represented an  
54 emerging class of opportunistic pathogens isolated from human sources including stool, abscesses  
55 and wounds [2-6]. However, the majority of newly cultivated isolates originate from non-human  
56 environmental sources, including a soil-seeded microbial fuel cell [7], higher [8] and lower  
57 termites [9,10], marine beach sand [11], paper mill sludge [12] and omnivorous cockroaches [13].  
58 Sequences of the 16S rRNA gene of *Dysgonomonas* are prevalent in insect associations, such as  
59 honeybee [14], dipteran flies [15-18], including several *Drosophila* species [19-21], beetles [22-  
60 26], and several life stages of three major mosquito genera, *Culex* [27,28], *Aedes* [29,30] and  
61 *Anopheles* [31,32]. *Dysgonomonas*-derived 16S rRNA gene sequences are routinely observed  
62 associated with xylophagous cockroaches [33-38] and as ectosymbionts of nematodes living in the  
63 cockroach digestive system [39], as well as in the hindguts of phylogenetically related termites  
64 [40-44]. *Dysgonomonas* have been identified as core microbiota of both higher [45] and lower [46]  
65 termites, including *Reticulitermes flavipes* [47]. There is growing interest in *Dysgonomonas* due  
66 to their prevalence in biotechnological processes such as lignocellulose degradation and  
67 bioconversion of polysaccharides for biofuel development [48,49], microbial fuel and electrolysis  
68 cells [50-57], wastewater bioreactors [58,59], biodegradation of food waste [60,61] and  
69 pharmaceutical compounds [58,62-64].

70 Members of genus *Dysgonomonas* are described as fastidious [3,4,65] owing to growth  
71 requirements satisfied only by rich, complex media containing whole or digested animal-derived  
72 components. For example, both the American Type Culture Collection (ATCC) and the German  
73 Collection of Microorganisms and Cell Cultures (DSMZ) recommend culture of *Dysgonomonas*  
74 on complex media containing enzymatic digests of animal-derived proteins, yeast- or animal-tissue  
75 extracts, defibrinated animal blood and other rarely required growth factors used by other  
76 fastidious organisms. Pre-mixed media formulations for these recommended media are widely  
77 available and can offer convenience, but are relatively expensive and cannot be easily tailored for  
78 experimental purposes. In-house preparations of these media can be made, but since many

79 common recipes were created for the purpose of growing bacteria with diverse nutritional  
80 requirements, nearly all available media contain components that can be expensive or difficult to  
81 prepare and may be superfluous for the growth of *Dysgonomonas*. The Known Media Database  
82 (KOMODO) [66] is a collection of known organism-media pairings, and its online tool  
83 GROWREC (<http://komodo.modelseed.org/growrec.htm>) uses phylogenetic and ecological  
84 similarity to predict growth-permitting media for an organism. While this database performs well  
85 to determine complex anaerobic media formulations specific to *Dysgonomonas*, it is unable to  
86 offer either chemically defined or aerobic media formulations. Defined media created for the  
87 closely related genus *Bacteroides* [67,68] have been shown to support the growth *Dysgonomonas*  
88 *gadei* and *Dysgonomonas mossii* [69], but we observed poor growth from our isolates in these  
89 liquid media when serially cultured (unpublished results). *Dysgonomonas alginatilytica* has been  
90 reported to grow on a defined medium consisting only of basal salts and kraft-lignin [12], and  
91 while this medium may contain adequate reduced carbon and concomitant micronutrients, it lacks  
92 major components of the media known to support the growth of *Dysgonomonas*. Defined media  
93 have been described for closely-related *Porphyromonas gingivalis* [70,71], but contain  
94 components such as casitone that are not truly defined, or lack known required nutritional  
95 components such as B-vitamins. Described species of *Dysgonomonas* are facultatively anaerobic  
96 on complex media [3-5,7-9,11,72], but our isolates exhibited slow growth and altered colony  
97 morphology when grown aerobically on available complex media formulations. ATCC  
98 recommends that members of *Bacteroidaceae* be grown anaerobically using pre-reduced medium  
99 containing sodium sulfide, cysteine, or coenzyme M as reducing agents (ATCC Bacterial Culture  
100 Guide, 2015). These reductants, and expensive equipment such as anaerobic chambers, may be  
101 unnecessary given the facultative nature of *Dysgonomonas*.

102 The lack of chemically defined media for members of *Dysgonomonas* precludes a deeper  
103 understanding of physiological and metabolic potential and dampens the ability to perform  
104 phenotypic analyses. Furthermore, defined media complement the development of genetic tools,  
105 such as the addition or omission of specific components for the purpose of genetic selections. Here,  
106 we developed chemically defined media formulations based on the minimal growth requirements  
107 of four *Dysgonomonas* isolates belonging to differing phylogenetic clades within the genus. The  
108 parallel media formulations *Dysgonomonas* Complex Medium (DCM), *Dysgonomonas* Defined  
109 Medium (DDM) and *Dysgonomonas* Minimal Medium (DMM) make use of widely available



110 components, offer straightforward preparation, allow growth in liquid or solid culture and permit  
111 growth under aerobic or anaerobic conditions. Finally, we demonstrate the ease with which our  
112 minimal media (DMM) allows enrichment of *Dysgonomonas* from microbially-complex  
113 environmental samples such as the lower termite hindgut.

## 114 **Materials and methods**

### 115 **Isolation & maintenance of bacteria from termite hindguts**

116 *Dysgonomonas* spp. BGC7 and HGC4 were generously provided by Dr. Michael C. Nelson and  
117 Dr. Joerg Graf at the University of Connecticut. *R. flavipes* termites were collected from decaying  
118 oak tree stumps in Granby, CT, USA (Lat: 41.999316, Long: -72.789053) during September 2017.  
119 All isolations were performed in a laminar flow hood using sterile instruments and reagents.  
120 *Dysgonomonas* spp. GY75 and GY617 were isolated by washing ten worker termites in 95%  
121 ethanol and aseptically extirpating hindguts using the technique described by Matson et al. [73].  
122 Hindgut contents were pooled into 1 ml sterile 1X M9 salts (5.8 g/L Na<sub>2</sub>HPO<sub>4</sub> (Fisher, Pittsburgh,  
123 PA, USA), 3.0 g/L KH<sub>2</sub>PO<sub>4</sub> (Fisher), 0.50 g/L NaCl (Fisher), 1.0 g/L NH<sub>4</sub>Cl (Fisher), 0.011 g/L  
124 CaCl<sub>2</sub> (Acros Organics, Geel, Belgium), 0.25 g/L MgSO<sub>4</sub> (Acros)) and the entire volume added to  
125 a 2-ml screw-capped microcentrifuge tube (USA Scientific, Ocala, FL, USA) containing 200 mg  
126 of 1 mm glass beads (Biospec, Bartlesville, OK, USA) and processed for 30 seconds on a Mini-  
127 Beadbeater-16 (Biospec). Homogenized samples were serially diluted in sterile 1X M9 salts and  
128 plated onto peptone-yeast extract-blood-glucose medium (PYBG; 6 g/L Na<sub>2</sub>HPO<sub>4</sub>·7H<sub>2</sub>O, 10 g/L  
129 proteose peptone #3 (US Biological, Salem, MA, USA), 10 g/L yeast extract (Bacto, Mt Pritchard,  
130 NSW, Australia), 10% whole sheep blood (Lampire, Pipersville, PA, USA), 0.5% D-glucose  
131 (Acros), 50 µg/ml kanamycin sulfate (Gibco, Dublin, Ireland) and 1.5% w/v agar (Bacto)). Plates  
132 were incubated anaerobically for 5 days at 22°C in a gloveless anaerobic chamber (Coy, Grass  
133 Lake, MI, USA) under an atmosphere of 5.5% CO<sub>2</sub>, 5.5% H<sub>2</sub> and 89% N<sub>2</sub>. Isolates with colony  
134 morphology similar to *Dysgonomonas* to were serially sub-streaked twice onto the same medium  
135 and incubated under the same conditions. Purified isolates of two strains, GY75 and GY617, were  
136 grown under anaerobic conditions at 22°C in rich peptone-hemin-glucose medium (rPHG; 6 g/L  
137 Na<sub>2</sub>HPO<sub>4</sub>·7H<sub>2</sub>O, 30 g/L proteose peptone #3, 10 g/L yeast extract, 50 mg/L porcine ferric hemin  
138 (MP Biomedicals, Santa Ana, CA, USA; prepared as an aqueous solution of 0.5 g/L in 10 mM  
139 NaOH (Fisher)), 0.5% w/v D-glucose, 50 µg/ml kanamycin sulfate, 1% v/v Wolfe's Mineral

140 Solution [74] (WMS; 3.0 g/L MgSO<sub>4</sub>·7H<sub>2</sub>O (Acros), 1.5 g/L nitrilotriacetic acid (Acros), 1.0 g/L  
141 NaCl, 0.5 g/L MnSO<sub>4</sub>·2H<sub>2</sub>O (Acros), 0.1 g/L CoCl<sub>2</sub>·6H<sub>2</sub>O (Sigma, St. Louis, MO, USA), 0.1 g/L  
142 ZnSO<sub>4</sub>·7H<sub>2</sub>O (Research Organics, Cleveland, OH, USA), 0.1 g/L CaCl<sub>2</sub>·2H<sub>2</sub>O (Acros), 0.1 g/L  
143 FeSO<sub>4</sub>·7H<sub>2</sub>O (Research Organics), 0.025 g/L NiCl<sub>2</sub>·6H<sub>2</sub>O (Acros), 0.02 g/L KAl(SO<sub>4</sub>)<sub>2</sub>·12H<sub>2</sub>O  
144 (Fisher), 0.01 g/L CuSO<sub>4</sub>·5H<sub>2</sub>O (Sigma), 0.01 g/L H<sub>3</sub>BO<sub>3</sub> (Fisher), 0.01 g/L Na<sub>2</sub>MoO<sub>4</sub>·2H<sub>2</sub>O  
145 (Sigma), 0.3 g/L Na<sub>2</sub>SeO<sub>3</sub>·5H<sub>2</sub>O (Sigma)) and 5% v/v Wolfe's Vitamin Solution [74] (WVS; 2.0  
146 mg/L biotin (Fisher), 2.0 mg/L folic acid (Sigma), 10 mg/L pyridoxine-HCl (Sigma), 5.0 mg/L  
147 thiamine-HCl (Sigma), 5.0 mg/L riboflavin (Sigma), 5.0 mg/L nicotinamide (Sigma), 5.0 mg/L  
148 calcium-D-pantothenate (Sigma), 100 µg/L cyanocobalamin (Fisher), 5.0 mg/L p-aminobenzoic  
149 acid (PABA; Sigma), 5 mg/L α-lipoic acid (Sigma)), pH 7.5) before being frozen at -80°C in 20%  
150 (v/v) sterile glycerol (Acros). Isolates were cultured from glycerol stocks and maintained on solid  
151 PYBG medium incubated anaerobically for 72 hours at 22°C. Unless otherwise stated, cultures  
152 used as growth curve inocula were grown anaerobically at 22°C to stationary phase in Falcon 15  
153 ml polypropylene conical tubes (Corning, Corning, NY, USA) in 5 ml volumes.

#### 154 **Identification of bacterial isolates**

155 The identity of four strains of *Dysgonomonas* (isolates BGC7, HGC4, GY75 & GY617) were  
156 confirmed by sequencing nearly full-length 16S rRNA gene sequences (~1455 of 1535 bp,  
157 hereafter called 'full-length'). Single colonies from pure isolates were inoculated into 5 ml rPHG  
158 medium in 18 x 150 mm glass culture tubes (Fisher) containing 50 µg/ml kanamycin sulfate and  
159 incubated ~18 hours at 30°C aerobically without shaking. Overnight cultures were used for  
160 genomic DNA (gDNA) preparation using Promega Wizard Genomic DNA Purification Kit  
161 (Promega, Madison, WI, USA) or Epicenter MasterPure Complete DNA and RNA Purification  
162 Kit (Lucigen, Madison, WI, USA) according to manufacturer instructions. Isolated gDNA was  
163 checked for quality and concentration by gel electrophoresis and by spectrophotometry using a  
164 Take3 Micro-Volume Plate (BioTek, Winooski, VT, USA). Approximately 100 ng of gDNA was  
165 used as template for PCR using Q5 Hot Start DNA Polymerase (New England Biolabs (NEB),  
166 Ipswich, MA, USA) and primers Eubact\_27F (5'-AGAGTTTGATCMTGGCTCAG-3') and  
167 Eubact\_1492R (5'-TACGGYTACCTTGTTAC-3') (modified from [75]). A no-template control  
168 contained water in place of gDNA. PCR was performed using the manufacturer's recommended  
169 procedure with a primer annealing temperature of 50°C and a 45 second extension time, for a total

170 of 35 cycles. An aliquot of each PCR reactions was checked by gel electrophoresis for single  
171 amplicons before purifying the remaining reaction using Monarch DNA Gel Extraction Kit (NEB),  
172 per manufacturer instructions. PCR amplicons were A-tailed by incubating 750 ng of DNA with 2  
173 Units of Taq DNA Polymerase (NEB) and 0.2 mM dATP (Thermo Fisher Scientific, Inc.,  
174 Waltham, MA, USA) at 72°C for 30 minutes. A-tailed PCR amplicons were cloned into p-GEM-  
175 T Easy Vector System (Promega) per manufacturer instructions and ligation reactions introduced  
176 directly into electrocompetent XL1-Blue *E. coli* (Stratagene, La Jolla, California, USA) by  
177 electroporation. After a 1 hour recovery at 37°C in liquid SOC (10 g/L tryptone (Bacto), 2.5 g/L  
178 yeast extract, 0.6 g/L NaCl, 0.2 g/L KCl (Fisher), 3.6 g/L D-glucose, 2 g/L MgCl<sub>2</sub>·6H<sub>2</sub>O (Research  
179 Organics), cells were diluted 10-fold and plated on agarose-solidified LB (10 g/L tryptone, 5 g/L  
180 yeast extract, 10 g/L NaCl, 15 g/L agar) containing 100 µg/ml ampicillin sodium salt (Fisher), 47.6  
181 µg/ml (0.2 mM) isopropyl β-D-thiogalactopyranoside (IPTG; Fisher), 40 µg/ml (97.8 µM) 5-  
182 bromo-4-chloro-3-indolyl-β-D-galactopyranoside (X-gal; Fisher). Plates were incubated ~18  
183 hours at 37°C and individual white colonies screened for insert by colony PCR using primers  
184 M13\_F (5'-ACGACGTTGTAAAACGACGGCCAGT-3') and M13\_R (5'-  
185 ATTTACACAGGAAACAGCTATGACCA-3') GoTaq DNA Polymerase (Promega).  
186 Reactions were separated by gel electrophoresis, and insert-positive clones were cultured ~18  
187 hours in 5 ml LB broth containing 100 µg/ml ampicillin. Plasmid DNA was isolated using Promega  
188 PureYield Plasmid Miniprep System (Promega) and sent to Genewiz (South Plainfield, NJ, USA)  
189 for bidirectional dideoxy sequencing using primers M13\_F and M13\_R. Overlapping sequencing  
190 reads were assembled and 2-4X sequence coverage was obtained for each clone.

## 191 **Growth experiments**

192 Experiments were all performed in a basal media containing 1X M9 salts, and when required,  
193 amended by adding components to the following final concentrations (unless otherwise stated):  
194 1% w/v proteose peptone #3, 1% w/v casamino acids (Fisher), 0.1 mg/ml L-tryptophan (Sigma),  
195 0.1 mg/ml L-cysteine-HCl·H<sub>2</sub>O (Fisher), 0.1 mg/ml L-methionine (Sigma), 0.1 mg/ml each of  
196 nucleobases adenine, guanine, cytosine, thymine, uracil, hypoxanthine (Acros), 0.2 mg/ml L-  
197 ornithine-HCl (Acros), 0.2 mg/ml beta-nicotinamide adenine dinucleotide reduced disodium salt  
198 (NAD; Alfa Aesar, Lancashire, United Kingdom), 0.2 mg/ml diaminopimelic acid (DAP; Sigma),  
199 1% v/v WMS, 5% v/v WVS, 0.5% w/v D-glucose, 50 µg/ml kanamycin sulfate, 10% v/v hemin  
200 solution. Unless otherwise stated, cell cultures used for growth experiments were pre-grown

201 anaerobically without shaking for ~18 hours in 5 ml volumes of rPHG medium. Cultures were  
202 centrifuged and the cell pellet washed three times with 1X M9 salts. Optical density of the cultures  
203 at 595 nm was determined by spectrophotometry using BioTek Synergy HT or H1 automated plate  
204 readers (BioTek) then diluted to an OD<sub>595</sub> of 0.1 (200 µl of 1X M9 salts in 96-well microtiter plate  
205 (Corning #35-1172)) before being added to media at a final OD<sub>595</sub> of approximately 0.01 in 1X  
206 M9 salts. When stated, cells were starved of particular media components prior to performing  
207 growth curves as follows. Cultures pre-grown in rPHG medium were washed and diluted to OD<sub>595</sub>  
208 of 0.1 as described above, and subcultured 1:100 into 50 ml volume of defined medium or minimal  
209 medium lacking the specific component(s). Cultures were grown to component-limiting stationary  
210 phase before being washed, diluted and used as inoculum as stated above. When the presence of  
211 sulfate or ammonium was of concern, cells were washed and resuspended in sterile 1X phosphate-  
212 buffered saline (PBS; 8.0 g/L NaCl, 0.20 g/L KCl, 1.44 g/L Na<sub>2</sub>HPO<sub>4</sub>, 0.24 g/L mM KH<sub>2</sub>PO<sub>4</sub>, pH  
213 7.4) in place of 1X M9 salts. Water used to prepare all components and media was Fisher Optima  
214 HPLC-grade water (Fisher). Aerobic growth curves were performed using BioTek HT and H1  
215 Synergy microplate readers, using 220 µl total volume in 96-well micro-titer plates at 30°C.  
216 Automated optical density readings at 595 nm (OD<sub>595</sub>) were taken every 10 minutes following a  
217 30-second orbital shake. Where described, duplicate plates were inoculated and each plate grown  
218 in parallel under aerobic or anaerobic conditions as described above. Endpoint OD<sub>595</sub> readings  
219 were taken at the start and finish of each experiment, preceded by a 2-minute orbital shake. Unless  
220 otherwise indicated, all experiments included 2 biological replicates per plate with the exception  
221 of (i) auxanography for amino acids (**Figures S1 & S2**) & vitamins (**Figure S7**) which were  
222 performed as preliminary screens and subsequently followed by experiments to validate observed  
223 phenotypes; (ii) experiments examining a broad range of component concentrations such as L-  
224 cysteine or ferric hemin (**Figures S3, S5 & S6**). All experiments regardless of biological replicates  
225 were performed multiple times. Generation of graphs, as well as regression and statistical analyses  
226 were performed using GraphPad Prism v8 (GraphPad Software, La Jolla, CA, USA).

### 227 **Amino acid auxanography**

228 To reveal possible amino acid auxotrophies in wild-type *Dysgonomonas* isolates, a modified  
229 version of auxanography [76] was performed (**Figures S1 & S2**). To reduce experimental  
230 complexity, B-vitamins were supplied. Nucleobases, NAD and PABA were omitted, as they were  
231 not required for growth (**Figure 1**). Twenty-two individual amino acids (obtained from Sigma

232 except for L-cysteine-HCl·H<sub>2</sub>O), were prepared as 10 mg/ml aqueous solutions using concentrated  
233 NaOH or HCl to allow dissolution as necessary. All were free acids with the exception of the  
234 following chloride salts: L-ornithine-HCl, L-arginine-HCl, L-histidine-HCl, L-lysine-HCl and L-  
235 cysteine-HCl·H<sub>2</sub>O. Equal volumes of each amino acid in a pool were combined to 6 mL total  
236 volume, with each amino acid at a final concentration of 1.67 mg/ml. Pools can be found in **Table**  
237 **S1** and as follows: Pool 1: L-phenylalanine, L-serine, L-tryptophan, L-tyrosine, L-glutamine; Pool  
238 2: L-alanine, L-cysteine, L-threonine, L-asparagine, L-methionine, DAP; Pool 3: L-arginine, L-  
239 ornithine, L-aspartic acid, L-proline, L-glutamic acid; Pool 4: L-leucine, L-glycine, L-isoleucine,  
240 L-histidine, L-lysine, L-valine; Pool 5: L-phenylalanine, L-alanine, L-arginine, L-leucine; Pool 6:  
241 L-serine, L-cysteine, L-ornithine, L-glycine; Pool 7: L-tryptophan, L-threonine, L-aspartic acid,  
242 L-isoleucine; Pool 8: L-tyrosine, L-asparagine, L-proline, L-histidine; Pool 9: L-methionine, L-  
243 glutamic acid, L-lysine; Pool 10: L-glutamine, DAP, L-valine. Media were supplemented with  
244 amino acid pools at a ratio of 1:5 such that each amino acid was present at 0.33 mg/ml each. The  
245 final media consisted of 1X M9 supplemented with 5% v/v hemin solution, 5% WVS, 0.5% v/v  
246 WMS, 0.5% w/v D-glucose, 50 µg/ml kanamycin sulfate and a single amino acid pool. Cells were  
247 pre-grown in rPHG, washed and used as inoculum as described above, and growth curve analysis  
248 performed.

#### 249 **Determination of sulfur, nitrogen and iron requirements**

250 To determine L-cysteine and sulfate requirements (**Figure 2**), cells were pre-grown in DDM  
251 containing 0.569 mM L-cysteine, 1 mM MgSO<sub>4</sub>, 5% v/v WVS and 10% v/v hemin solution before  
252 being washed and diluted in 1X PBS and used for growth curves. Modified WMS (mWMS) was  
253 created by substituting magnesium chloride or manganese chloride (MnCl<sub>2</sub>·4H<sub>2</sub>O, Acros) salts for  
254 the magnesium and manganese sulfate salts in the standard WMS recipe. Growth curves were  
255 performed in either sulfate-replete (0.01% v/v WMS, 1 mM total SO<sub>4</sub><sup>2-</sup>) or sulfate-limited (0.01%  
256 v/v mWMS, 83 nM total SO<sub>4</sub><sup>2-</sup>) conditions. To determine if L-cysteine was able to be utilized as a  
257 sole source of nitrogen (**Figure S4**), cultures were pre-grown in rPHG, washed and resuspended  
258 in PBS, and used as inoculum for growth curves in the presence or absence of excess ammonium  
259 (18.7 mM from 1X M9) and/or 1.7 mM L-cysteine. For determination of growth response to hemin  
260 concentration (**Figures S5 & S6**) and for determination of alternate sources of iron beside ferric  
261 hemin (**Figure 3**), cells were pre-grown in rPHG, then washed and subcultured 1:100 in 50 ml  
262 DDM without hemin and grown to hemin-limited stationary phase. Cells were again washed,

263 diluted and then used for growth curves.

#### 264 **Determination of vitamin and mineral requirements**

265 To determine vitamin auxotrophy (**Figure S7**), twelve variations of DDM media were prepared.  
266 All variations lacked WVS and contained 9 out of 10 individual vitamins, which were prepared as  
267 0.1 mg/ml aqueous stock solutions and added to final concentration equal to that in 5% v/v WVS:  
268 (0.1 mg/L (0.41  $\mu$ M) biotin, 0.1 mg/L (0.23  $\mu$ M) folic acid, 0.5 mg/L (2.4  $\mu$ M) pyridoxine-HCl,  
269 0.25 mg/L (0.74  $\mu$ M) thiamine-HCl, 0.25 mg/L (0.66  $\mu$ M) riboflavin, 0.25 mg/L (2.0  $\mu$ M)  
270 nicotinamide, 0.25 mg/L (1.0  $\mu$ M) calcium-D-pantothenate, 5.0  $\mu$ g/L (3.7 nM) cyanocobalamin,  
271 0.25 mg/L (1.8  $\mu$ M) p-aminobenzoic acid, 0.25 mg/L (1.2  $\mu$ M)  $\alpha$ -lipoic acid). Cells were pre-  
272 grown in rPHG, washed and subcultured 1:100 in 50 ml DDM without WVS and grown to  
273 stationary phase. Starved cells were washed, diluted and used for growth curves as previously  
274 described. To validate requirements for specific vitamins observed during auxanography (**Figure**  
275 **4**), cells were first starved of vitamins as described and subsequently inoculated into DDM without  
276 WVS but containing combinations of biotin, thiamine, cyanocobalamin and L-methionine. We  
277 included trace metals (provided by WMS) in our defined media formulations due to the use of  
278 highly-purified molecular grade water in our experiments, and also to provide metal-replete  
279 conditions inclusive to the potential requirements of yet unknown enzymatic functions,  
280 particularly in the context of redox reactions, oxygen tolerance and lignocellulose degradation.  
281 WMS can be diluted 100-fold (0.01% v/v WMS) relative to the standard amount in DMM (1% v/v  
282 WMS) with no change in growth phenotype in defined media (**Figure 2**). If desired, trace metals  
283 may be omitted from media, particularly in the presence of complex components such as yeast  
284 extract or if using distilled or impure water sources.

#### 285 **Serial culture in DMM**

286 To confirm that DMM contained all nutritional requirements, cultures were serially transferred in  
287 DMM (**Figure 5**) as follows. Isolates were pre-grown anaerobically in 5 ml volume of liquid  
288 rPHG, washed, diluted as previously described and inoculated 1:20 into 200  $\mu$ l freshly prepared  
289 DMM in 96-well microtiter plates. Cultures were grown aerobically to stationary phase (48 hours)  
290 and endpoint OD<sub>595</sub> readings taken after a two-minute orbital shake. Each transfer event reflected  
291 a direct, unwashed 1:10 subculture into fresh DMM media. The transfer from rPHG to DMM  
292 represented transfer #0 and serial transfers were repeated 10 additional times. Datapoints represent



293 (OD final) – (OD initial) at 595 nm for each transfer. Linear regression analysis was performed  
294 using individual datapoints from all replicates and the best fit curves along with 95% confidence  
295 intervals were plotted. The slope of the linear fit is provided, along with the p-values indicating  
296 the probability of the slope being significantly non-zero.

### 297 **Growth kinetics in complex and minimal liquid media**

298 To create a set of interchangeable, parallel liquid media, we used DDM as a basal media to which  
299 10% w/v aqueous solutions of proteose peptone #3 and yeast extract were each added to a final  
300 concentration of 1% v/v. To demonstrate expected growth behaviors within and between media,  
301 DMM- or DCM-adapted cells were subcultured into either DMM or DCM, as follows. Several  
302 DCM-grown colonies of each isolate were used to inoculate 5 ml volumes of liquid DMM and  
303 grown to stationary phase as described. DMM cultures were pelleted, washed and subcultured  
304 1:100 into either DCM or DMM and again allowed to reach stationary phase. Subcultures were  
305 centrifuged, washed and resuspended as previously described and inoculated separately into DMM  
306 and DCM in triplicate. Growth curves were generated as previously described (**Figure 6**). Blank-  
307 corrected OD<sub>595</sub> values for the entire 96 hour duration were used as input data to measure growth  
308 kinetics in R [77] package Growthcurver [78] with default settings. Growth rates, generation times  
309 and carrying capacities along with standard error values are listed for each isolate in each condition  
310 in **Table 1**. Recipes for DMM, DDM and DCM as well as all required components can be found  
311 in **Tables S2 & S3**.

### 312 **Growth on agar-solidified media**

313 To create parallel, agar-solidified media, single antioxidants were added to agar-solidified DDM  
314 according to Dione et al. [79]. Aqueous solutions of reduced glutathione (Fisher, 10 mg/ml) L-  
315 ascorbic acid sodium salt (Acros; 10 mg/ml) or uric acid potassium salt (Sigma; 10 mg/ml in 1M  
316 NaOH) were prepared and added to 1.5% w/v agar-containing DDM at final concentrations of 0.1  
317 mg/ml, 1 mg/ml or 0.4 mg/ml, respectively. Media was pH-adjusted to 7.5 as necessary using  
318 concentrated HCl or NaOH. Isolates were cultured from rPHG-grown glycerol stocks onto agar-  
319 solidified complex medium and several colonies used to inoculate liquid DDM cultures.  
320 Stationary-phase cells were washed and resuspended to OD 0.1 and spotted onto agar-solidified  
321 DDM plates with and without antioxidant amendment. Plates were loosely bagged in plastic petri  
322 dish bags (Fisher) and incubated for 12 days aerobically at 22°C and photographed at 7 and 12



323 days post inoculation (dpi) (**Figure 7**). To test growth on solid DCM, single colonies of each isolate  
324 were taken from rPHG plates and streaked to isolation on DCM amended with 1.5% w/v agar and  
325 0.1 mg/ml reduced glutathione. Plates were incubated loosely bagged aerobically at 22°C or 30°C,  
326 or anaerobically at 22°C for 4 days (**Figure S8**). To test solid DMM, several colonies of each  
327 isolate were taken from solid DDM plates and individually resuspended into 200 µl 1X M9 salts,  
328 spotted onto agar-solidified DMM containing 0.1 mg/ml reduced glutathione and streaked to  
329 isolation. Plates were incubated with either no bag (unrestricted atmosphere) or sealed in a plastic  
330 bag (restricted atmosphere) and incubated aerobically at 30°C for 5 days (**Figure S9**).

### 331 **Enrichment of *Dysgonomonas* isolates from termite hindgut**

332 Termites were collected from the same site and colony as isolates GY75 and GY617 in June 2019  
333 during an alate (winged reproductive) swarming event. Hindguts from freshly collected worker  
334 (n=25) and alate (n=50) castes were extirpated and the contents separately prepared and diluted as  
335 previously described. Dilutions were plated on agar-solidified DMM containing 0.1 mg/ml  
336 reduced glutathione, 50 µg/ml kanamycin sulfate and 100 µg/ml cycloheximide (Acros), loosely  
337 bagged and incubated aerobically or anaerobically at 22°C for 4 days. Well-isolated colonies that  
338 exhibited morphology characteristic of *Dysgonomonas* (circular, convex, opaque, glossy, white-  
339 cream or light-brown in color) were purified by serially streaking onto the same medium, and 30  
340 isolates were selected for identification. We used a high-throughput screen to quickly identify the  
341 presence of *Dysgonomonas* spp. within the collection of isolates. Crude gDNA was prepared  
342 individually for each isolate, in which several colonies were resuspended in 100 µl sterile  
343 molecular-grade water, boiled at 95°C for 15 minutes and briefly centrifuged. The supernatant was  
344 used as template for PCR targeting the V4 region of the bacterial 16S rRNA gene. Each isolate  
345 was individually PCR amplified using Q5 Polymerase and primers 16S\_F (5'-  
346 GTGCCAGCMGCCGCGGTAA-3') and 16S\_R (5'-GGACTACHVGGGTWTCTAAT-3'), each  
347 flanked by 5' extensions containing unique combinations of forward or reverse indexing sequence  
348 and high-throughput sequencing adapters [80]. The negative control replaced lysate supernatant  
349 with water. Positive controls included lysate supernatant from *Dysgonomonas* spp. BGC7 &  
350 HGC4 and isolates GY75 & GY617. Amplicons were pooled, column-purified and sent to the  
351 UConn MARS Facility (University of Connecticut, Storrs, CT, USA) where libraries were  
352 prepared and sequenced on the Illumina MiSeq platform. Raw reads were processed in R using the  
353 package DADA2 [81] to quality filter and trim, merge, chimera-check, determine read error rates,

354 generate Amplicon Sequence Variants (ASVs) [82] and to assign taxonomy to ASVs using the  
355 SILVA rRNA database v132 [83]. Taxonomic assignments were manually inspected and  
356 preliminary identification was determined by the taxonomic group with which >95% of reads were  
357 placed, with the remaining reads attributed to PCR and sequencing errors that passed the filtering  
358 process. Isolates that were identified as belonging to genus *Dysgonomonas* (24 of 30), along with  
359 the controls, clustered into 4 discrete ‘ASV-groups’ (ASV\_1, ASV\_2, ASV\_4, and ASV\_5), each  
360 of which contain 253 bp sequences with 100% identity with each other. ASVs from this study can  
361 be found in **Table S4**. To aid in resolving subtle variations in 16S rRNA gene heterogeneity within  
362 ASV-groups, a subset of the isolates (13 of 24) containing representatives from each ASV-group  
363 were selected for bidirectional dideoxy sequencing to obtain full length 16S rRNA gene sequences.  
364 gDNA template was prepared and quantified for each isolate within the subset. PCR, cloning and  
365 sequencing were carried out as previously described. Sequences were trimmed of primer sequence  
366 and base-calls manually inspected and curated using the generated ASV sequences as a reference.  
367 Full-length 16S rRNA gene sequences for *Dysgonomonas* isolates obtained or used in this work  
368 (AAAn1, AAAn3, AAAn4, AAAn6, AAAn7, AAAn9, AAAn11, BGC7, GY75, GY617, HGC4, WAe4,  
369 WAe5, WAe6, WAe3, WAn2, WAn3) were submitted to GenBank under accession numbers  
370 MT340871-MT340887, respectively. Isolates were named by isolation source (Worker or Alate),  
371 oxygen condition (Aerobic or Anaerobic), and isolate number. For example, isolate AAAn1 was  
372 isolated from alate hindguts under anaerobic conditions, while WAe3 was isolated from a worker  
373 hindgut under aerobic conditions. Colonies with morphology consistent with that of  
374 *Dysgonomonas* were obtained aerobically from alate hindguts (AAe) but were discarded due to  
375 fungal overgrowth. Reference sequences from cultured members of *Dysgonomonas* and from  
376 representative taxa from within the *Bacteroidetes* greater than 1.2 kb in size were obtained from  
377 RefSeq or GenBank, in order of preference, on April 8, 2020. Reference sequences were trimmed  
378 of primers and aligned with those from *Dysgonomonas* spp. BGC7 and HGC4 and isolates from  
379 this study using the MUSCLE algorithm in Geneious R9 with default settings (see **File S1** for  
380 multiple sequence alignment of 16S genes and **File S2** for pairwise nucleotide identifies). IQ-  
381 TREE v2.0 [84] was used for substitution model testing and maximum likelihood phylogenetic  
382 reconstruction using model TIM3e+I+G4. Branch support values were calculated using 1000  
383 Ultrafast Bootstraps and SH-aLRT testing. Isolation sources for *Dysgonomonas* isolates not from  
384 this study were obtained from the published reference when available or from data associated with

385 the RefSeq/GenBank entry. Formatting and metadata were applied in R using packages dplyr [85],  
386 ggplot2 [86], treeio [87], ggtree [88], and ggrepel [89]. Explanations of formatting and metadata  
387 can be found in the legend for **Figure 8**.

## 388 **Results and discussion**

### 389 **Growth in complex vs. defined media**

390 We tested four phylogenetically diverse termite-derived *Dysgonomonas* isolates for their ability to  
391 grow in aerobic, liquid media consisting of M9 salts supplemented with trace minerals, ferric  
392 hemin, B-vitamins, D-glucose and proteose peptone (**Figure 1**). Previous experiments determined  
393 that removal of peptone, and thus amino acids, from the medium resulted in no growth from all  
394 isolates (data not shown), suggesting a growth requirement for one or more components found in  
395 peptone. To determine which components of peptone were necessary to sustain growth, cultures  
396 were supplied with B-vitamins (WVS) and trace metals (WMS), and proteose peptone was  
397 replaced with either casamino acids or a mixture of twenty individual free amino acids, each at 0.1  
398 mg/ml. Casamino acids were supplemented with 0.1 mg/ml L-tryptophan and L-cysteine to  
399 replenish amino acids lost during acid hydrolysis. In comparison to growth in a medium with  
400 peptone, isolates BGC7, HGC4 and GY617 exhibited slight decreases in growth rate and yield  
401 when grown with casamino acids. Isolate GY75 displayed growth kinetics most comparable to that  
402 on peptone, demonstrating a very slight decrease in growth rate, and no discernible reduction in  
403 yield. Free amino acids were able to be substituted for peptone or casamino acids for all isolates,  
404 though growth rates and yields were decreased. Additionally, isolates HGC4 and GY617 exhibited  
405 a slight diauxie-like phenotype when grown with casamino acids which was exacerbated by growth  
406 on free amino acids. This phenotype may be attributed to differences the relative abundance of  
407 particular amino acids or oligopeptides between the supplements. Nucleobases, NAD and non-  
408 proteinogenic amino acids L-ornithine and DAP were not required for growth, nor did they  
409 contribute to additional yield increases beyond that of free proteinogenic amino acids alone.  
410 Nucleobases had a negative effect on all measures of growth from isolate BGC7, perhaps due to  
411 interference between biosynthesis and salvage pathways. Together these results suggested that  
412 growth could occur on oligopeptides or free amino acids in the presence of trace metals and B-  
413 vitamins, and suggested a possible amino acid auxotrophy.

#### 414 **Amino acid auxanography**

415 Amino acid auxanography was performed to determine the growth requirement for one or more  
416 amino acids. Isolates HGC4, GY75 and GY617 exhibited growth only on amino acid pool 2 (L-  
417 alanine, L-cysteine, L-threonine, L-asparagine, L-methionine, DAP) & pool 6 (L-serine, L-  
418 cysteine, L-ornithine, glycine), which suggested L-cysteine as the single limiting amino acid  
419 (**Figures S1 & S2**). Additionally, isolates HGC4 & GY617 again exhibited a diauxie-like growth  
420 phenotype, likely indicating limitation of one of more preferred nutrients in the auxanography  
421 growth medium. Isolate BGC7 exhibited growth on pools 2, 6 & 9 (L-methionine, L-glutamic acid,  
422 L-lysine), with greatest yield on the L-cysteine- and L-methionine-containing pool 2. Pool 6,  
423 which contained L-cysteine but not L-methionine, was growth-permitting for isolate BGC7, but  
424 both growth rate and yield suffered. Isolate BGC7 also exhibited weak, linear growth on pool 9,  
425 suggesting that L-methionine alone, while not optimal, is growth-permitting under the conditions  
426 tested (**Figure S2**). These results suggest that L-cysteine alone or in combination with L-  
427 methionine can replace complex sources of amino acids and allow exponential aerobic growth of  
428 *Dysgonomonas*.

#### 429 **L-cysteine is required during growth under aerobic or anaerobic conditions**

430 To examine relationship between growth kinetics and L-cysteine, isolates were grown aerobically  
431 and anaerobically across a range of L-cysteine concentrations. Freshly prepared trace metals, B-  
432 vitamins and ferric hemin were provided and L-cysteine supplemented between 0-5.69 mM. All  
433 cultures exhibited concentration-dependent phenotypes in relation to L-cysteine (**Figure S3**) under  
434 both aerobic and anaerobic conditions. With respect to growth rate under aerobic conditions,  
435 isolates displayed either a positive correlation with L-cysteine concentration (isolate BGC7) or a  
436 binary response (isolates HGC4, GY75 & GY617) in which nearly maximal growth rate was  
437 achieved at the lowest concentration tested (0.285 mM). When L-cysteine was absent from aerobic  
438 media, isolates exhibited extended lag phase, periods of linear growth and early entry to stationary  
439 phase suggestive of L-cysteine limitation. Similar to the results from amino acid auxanography,  
440 isolate BGC7 grew modestly under aerobic conditions in the absence of L-cysteine and exhibited  
441 extended lag phase, low growth rate and low yield. Isolate BGC7 exhibited reduced lag time and  
442 an increase in growth yield, as well as an increase in growth rate that was positively correlated  
443 with L-cysteine concentration up to 3.42 mM, beyond which no gains in growth rate, or yield,  
444 were obtained. Anaerobic growth of isolate BGC7 showed positive correlation between L-cysteine

445 concentration and final yield up to 4.56 mM. Aerobically, isolate HGC4 and isolates GY75 &  
446 GY617 did not exhibit the same relationship between L-cysteine and growth rate as isolate BGC7,  
447 and instead displayed a binary response which required only 0.285 mM to achieve near-maximal  
448 growth rates and yields. For isolates HGC4 and GY617, 0.285 mM L-cysteine was yield-limiting,  
449 but 0.596 mM was considered L-cysteine replete under the conditions tested. Anaerobic growth  
450 was similarly binary for these isolates, with no growth occurring in the absence of L-cysteine. The  
451 replacement of peptones or casamino acids with L-cysteine as a component of the basal salt-  
452 vitamin-hemin-glucose medium led to the development of a chemically defined medium, which  
453 was later refined to become DDM.

454 As previous experiments demonstrated L-cysteine-dependent growth, we sought to determine  
455 whether pre-growth in rich medium provided the means for cells to intracellularly store sulfur and  
456 permit moderate growth in media without L-cysteine. Forthcoming draft genome assemblies for  
457 *Dysgonomonas* isolates BGC7, HGC4, GY75 & GY617 all contain genes encoding sulfate  
458 permease, but pathways for assimilatory sulfate reduction are absent. As such, we were further  
459 interested to determine whether sulfate was necessary in the presence of a reduced, assimilable  
460 source of organic sulfur such as L-cysteine. Cultures were pre-grown to stationary phase in DDM  
461 with 0.57 mM L-cysteine, washed several times and diluted into PBS. Prepared cells were diluted  
462 1:100 into fresh media with and without sulfate or L-cysteine and grown under aerobic and  
463 anaerobic conditions. Sulfate-limited DDM (0.01% v/v mWMS) contained 83 nM total sulfate,  
464 which is ~300-fold less than the required 26.5  $\mu$ M for *Salmonella typhimurium* to achieve an OD<sub>420</sub>  
465 of 1 in MOPS medium [90], while sulfate-replete DDM (0.01% v/v WMS) contained 1 mM total  
466 sulfate. L-cysteine concentrations were either 0 or 1.71 mM, and kanamycin sulfate was omitted  
467 from all media. It should be noted that both sulfate-replete and sulfate-limited DDM contain the  
468 vitamins biotin, thiamine and lipoic acid (found in WVS). These cofactors contain organic reduced  
469 sulfur, and together contribute ~1.15  $\mu$ M to the pool of putatively available reduced sulfur. All  
470 isolates failed to grow either aerobically or anaerobically in the in the absence of L-cysteine,  
471 regardless of the presence of sulfate in the medium, which suggested a requirement for a reduced  
472 form of assimilable sulfur (**Figure 2**). These results further suggested that the growth of isolate  
473 BGC7 in the absence of L-cysteine observed in **Figures S2 & S3** may be attributed to intracellular  
474 sulfur stores present as a consequence of pre-growth in complex medium. Aerobic growth  
475 phenotypes were nearly identical for all isolates in the presence of L-cysteine, regardless of the

476 presence of sulfate in the medium, which suggested that sulfate is not required aerobically in the  
477 presence of L-cysteine. Although sulfate was unable to replace L-cysteine as a sulfur source,  
478 anaerobic growth was stimulated by the presence of sulfate, particularly for isolate HGC4 and  
479 isolate GY75. The role of sulfate during anaerobic growth is unclear, but it is perhaps used as an  
480 alternative electron acceptor during anaerobic respiration. All isolates were able to utilize the  
481 tripeptide glutathione (glutamate-cysteine-glycine) to some degree in place of L-cysteine, and  
482 isolate BGC7 was further able to utilize L-methionine as a sulfur source. No growth occurred when  
483 L-cysteine was replaced with thiosulfate, thioglycolate, 2-mercaptoethanol or dithiothreitol (not  
484 shown). Sodium sulfide was not tested, but was found to be a suitable sulfur source for *Bacteroides*  
485 *fragilis* [67].

486 The precise roles of L-cysteine are difficult to discern over the range of concentrations tested here  
487 (0.1-10 mM), as it can be imported and used directly as a substrate for peptide synthesis, as a  
488 source of assimilable reduced sulfur [67], or as a reducing agent [79,91] to lower the redox  
489 potential of the medium. Draft genome assemblies contain complete L-cysteine and other  
490 proteinogenic amino acid biosynthesis pathways suggesting that the isolates are not amino acid  
491 auxotrophs, and the ability of L-cysteine concentration to modulate final growth yield also  
492 suggests that it is an exhaustible nutrient, assimilated into biomass, or both. Moreover, the  
493 requirement for L-cysteine anaerobically suggests that its function as a reductant provides a minor  
494 contribution to its role in growth. The inability of other sulfur-containing reducing agents to permit  
495 growth may be due simply to the inability of *Dysgonomonas* to effectively assimilate reduced  
496 sulfur under the provided conditions. Taken together, these results suggest that L-cysteine is  
497 utilized as an easily assimilable source of reduced sulfur, and that other roles that it may provide  
498 are secondary to this function.

#### 499 **Growth using L-cysteine as the sole source of nitrogen**

500 To determine if L-cysteine could also be utilized as a sole source of nitrogen, cultures were grown  
501 in the presence or absence of excess ammonium and/or 1.7 mM L-cysteine, which should not be  
502 significantly yield-limiting as the sole source of nitrogen [90] under these conditions. All isolates  
503 were able to grow in the absence of ammonium, using L-cysteine as a sole source of nitrogen under  
504 aerobic and anaerobic conditions (**Figure S4**). Using L-cysteine as a nitrogen source, isolate GY75  
505 exhibited a 24-hour lag before exponential growth using L-cysteine under aerobic conditions.  
506 Isolates BGC7, HGC4 & GY617 exhibited similar growth rates to their counterparts grown with



507 ammonium and L-cysteine, but entered stationary phase early, perhaps due to nitrogen limitation  
508 or buildup of toxic end products of L-cysteine catabolism such as hydrogen sulfide [92]. Under  
509 aerobic conditions in the absence of both ammonium and L-cysteine, some weak growth occurred  
510 aerobically, but not anaerobically, which could be indicative of scavenged and assimilated trace  
511 nitrogen from the medium (hemin, 0.3 mM; kanamycin, 0.34 mM; WMS, 0.078 mM; biotin, 0.82  
512  $\mu\text{M}$ ; thiamine, 2.96  $\mu\text{M}$ ; cyanocobalamin, 51.6 nM; totaling  $\sim 0.7$  mM nitrogen) or that the growth  
513 was enabled by utilizing intracellular nitrogen stores. Further analysis of nitrogen sources was  
514 precluded by the requirement for L-cysteine for growth and its ability to be used as a nitrogen  
515 source. Under anaerobic conditions, isolates exhibited approximately half the yield as compared  
516 to those grown under ammonium-replete conditions. We speculate that assimilation of organic  
517 nitrogen could be unfavorable during anaerobic growth under the provided conditions.

### 518 **Requirement for ferric hemin**

519 Our *Dysgonomonas* isolates had previously been observed to require ferric hemin when grown  
520 under aerobic or anaerobic conditions, even when grown in complex media such as rPHG (author  
521 observation). Hemin, a ferric-iron carrying porphyrin, is biosynthesized through a costly and  
522 complex pathway, making it a valuable commodity. Respiration requires both sufficient quantities  
523 of iron for redox reactions, and iron-containing porphyrins for synthesis b-type cytochromes,  
524 [67,90,93] which hemin could provide. We sought to determine growth-limiting concentrations of  
525 hemin for our *Dysgonomonas* isolates when D-glucose was used as a carbon source (**Figure S5**).  
526 Cultures were hemin-starved and prepared as described in Materials & Methods before being used  
527 for growth curves. Hemin was present in media at final concentrations between 0 and 153.4  $\mu\text{M}$   
528 (0-20% v/v hemin solution). Similar to that observed in *Bacteroides fragilis* [94], growth of  
529 *Dysgonomonas* under aerobic conditions exhibited a positive correlation between hemin  
530 concentration and growth yield, up to the growth-saturating concentration for that organism where  
531 hemin became excessive and yield remained constant. Isolates did not grow when hemin  
532 concentration was below 7.67  $\mu\text{M}$  (1% v/v hemin solution), demonstrating a hemin requirement,  
533 though growth-permissive concentrations differed among the isolates tested. All isolates also  
534 exhibited poor growth at their respective lowest growth-permissive concentration. Poor growth  
535 included extended lag time, slower growth rate and lower yield. Isolates BGC7 and HGC4 required  
536 38.4  $\mu\text{M}$  hemin for growth to occur, with 61.3  $\mu\text{M}$  sufficient for near-maximal growth rate and  
537 yield. Isolate GY75 required the least ferric hemin for growth (7.67  $\mu\text{M}$ ) and again achieved near-



538 maximum growth rate and yield in the presence of 38.4  $\mu\text{M}$ . Isolate GY617 required the greatest  
539 concentration of ferric hemin (46.0  $\mu\text{M}$ ) for growth to occur, and near-maximal growth rate  
540 required at least 76.7  $\mu\text{M}$  hemin. Ferric hemin had no deleterious effects on growth of any isolates  
541 at the higher concentrations tested under these conditions. Hemin requirements may change  
542 depending on carbon source, particularly if growth requires extensive oxidation of substrates  
543 performed by iron-cofactor dependent electron carriers.

544 Under anaerobic conditions, the hemin concentration-yield relationship was consistent with a  
545 third-order polynomial in which concentration was positively correlated with yield at lower  
546 concentrations, but yields either plateaued or decreased over a range of concentrations before  
547 reaching maximal yield in the presence of 153  $\mu\text{M}$  hemin (**Figure S6**). Though all isolates  
548 exhibited the greatest yield in the presence of 153  $\mu\text{M}$  hemin (20% v/v hemin solution), isolates  
549 BGC7, HGC4, GY75 and GY617 each also exhibited a secondary, local maximal yields at 46.0  
550  $\mu\text{M}$ , 30.67  $\mu\text{M}$ , 46.0  $\mu\text{M}$  and 76.7  $\mu\text{M}$  hemin, respectively. Lower concentrations of hemin were  
551 required under anaerobic than under aerobic conditions for all isolates, consistent with a switch  
552 from aerobic respiration to fermentation, which could require fewer iron-containing electron  
553 carriers and respiratory cytochromes. Isolates HGC4 and GY617 required 15.4  $\mu\text{M}$  to exhibit  
554 growth, roughly half of that required aerobically. Isolate BGC7 required only 3.83  $\mu\text{M}$  hemin but  
555 growth was limited to  $\sim$ 2.5 generations. Isolate GY75 was able to grow in the absence of hemin,  
556 consistent with having the least requirement for hemin during aerobic growth, but was growth was  
557 limited to under two generations. It is noteworthy that all isolates can exhibit characteristics  
558 consistent with hemin accumulation during growth in hemin-replete media similar to that of close  
559 relative *Porphyromonas gingivalis* ([95] and references therein), such as the formation of brown  
560 cell pellets from liquid culture or darkening of colonies on agar-solidified media. Isolate GY75  
561 routinely exhibits the greatest cell darkening (author observation) and its ability to grow using the  
562 least amount of hemin of the four isolates under aerobic and anaerobic conditions is consistent  
563 with the ability to sequester ferric hemin within the periplasm or at the outer cell membrane.

564 We further sought to determine whether ferric hemin was able to be replaced with alternate sources  
565 of iron (**Figure 3**). In addition to ferric hemin, we tested soluble ferric chloride and two ferric  
566 chelates; ferric-EDTA and ferric-citrate, as well as soluble ferrous sulfate alone. All conditions  
567 were considered replete for ferrous iron by the addition of 1% v/v WMS which provided 3.6  $\mu\text{M}$   
568 ferrous sulfate, the standard for DDM. For all isolates, ferrous iron alone was insufficient to permit

569 growth, and similar to *Prevotella intermedia* [96], none of the soluble or ferric chelates were able  
570 to replace ferric hemin under aerobic or anaerobic conditions. Hemin was ultimately used at 76.7  
571  $\mu\text{M}$  (10% v/v hemin solution) in our final media recipes as it was not significantly rate- or yield-  
572 limiting and reduced the risk for heme-toxicity which can occur at high concentrations [93].  
573 Although beyond the scope of this study, it would be interesting to determine the ability for  
574 *Dysgonomonas* utilize non-heme iron in the presence of alternate porphyrins such as  
575 protoporphyrin IX such as related bacteria such as *P. intermedia* [96] *P. ruminicola* [97], *P.*  
576 *gingivalis* [98] and are able.

### 577 **Vitamin requirements**

578 Previous experiments determined that WVS was required for growth by all isolates when grown  
579 without peptone (data not shown), indicative of auxotrophy for one or more B-vitamins. To screen  
580 for vitamin auxotrophies, cultures were vitamin-starved and prepared as previously described  
581 before being inoculated into 12 different B-vitamin-replete media, each with an omission of a  
582 single cofactor (**Figure S7**). Removal of biotin, thiamine or cyanocobalamin limited growth from  
583 all isolates with the exception of isolate BGC7, which exhibited significantly slower growth rate  
584 but similar yield in the absence of cyanocobalamin. All isolates were able to grow to some degree  
585 in the absence of biotin, which suggested intracellular reserves in the inocula were not yet biotin-  
586 limited during the vitamin pre-starvation procedure. All isolates exhausted their intracellular biotin  
587 stores through cell growth and dilution within a few generations and growth ceased. We  
588 subsequently tested the requirements for these three cofactors by omitting WVS from the medium,  
589 amending only with biotin, thiamine and cyanocobalamin and then removing each cofactor  
590 individually (**Figure 4**). Consistent with previous findings, all isolates displayed the expected  
591 growth phenotypes when provided biotin, thiamine and cyanocobalamin together. Omission of all  
592 vitamins resulted in absence of growth from all isolates. Thiamine and biotin were required for the  
593 growth of all isolates, while cyanocobalamin was required for all but isolate BGC7. Some growth  
594 was observed from all isolates in the absence of biotin, again suggesting that cells in the vitamin-  
595 starved inocula contained an exhaustible intracellular pool of biotin. Isolates also exhibited some  
596 degree of oscillatory growth in the absence of biotin alone. For example, isolates HGC4 and  
597 GY617 ultimately entered a death phase after oscillation, while isolate BGC7 continued a pattern  
598 of linear growth, indicative of cofactor limitation. Isolate GY75 exhibited oscillatory growth in the  
599 absence of biotin for the duration of the 96-hour assay. Cyanocobalamin was required for growth

600 for all strains except BGC7, which exhibited a lower growth rate but nearly equivalent yield  
601 compared to cells grown with cobalamin. Cobalamin-independent growth of isolate BGC7 was  
602 confirmed by diluting washed cells 1:100 into fresh medium without cyanocobalamin and allowed  
603 to reach stationary phase. Cells were able to be serially passaged three times in this manner (not  
604 shown), which confirmed that isolate BGC7 can indeed grow in the absence of cyanocobalamin.  
605 Genomic data show the absence of de novo cobalamin biosynthetic pathways, but we cannot rule  
606 out the ability of isolate BGC7 to biosynthesize cobalamin through non-canonical pathways. It  
607 also cannot be ignored that hemin and cobalamin share the intermediate compound  
608 uroporphyrinogen-III, which could be, although energetically costly, created by dissimilation of  
609 hemin. This conundrum has been previously explored in *Porphyromonas gingivalis* [98], although  
610 clear answers were also not derived. Alternatively, it is possible that isolate BGC7 could grow in  
611 the absence of cobalamin due to the presence of genomic features such as cobalamin-independent  
612 methionine synthase, for example. In the presence of thiamine and biotin, the substitution of  
613 cyanocobalamin with L-methionine allowed high growth rates for all isolates, although the  
614 provided 0.67 mM L-methionine appeared yield-limiting for isolate GY75. This result suggests  
615 that although cyanocobalamin may be required to perform multiple functions, a major role for  
616 cellular cobalamin during aerobic and anaerobic growth of some *Dysgonomonas* species is likely  
617 biosynthesis of L-methionine [99].

### 618 **Serial culture in DMM**

619 To be certain that DMM did not lack growth factors required only in trace amounts, we performed  
620 ten serial aerobic transfers of four *Dysgonomonas* isolates in DMM. Cells from previous DMM  
621 cultures were diluted 1:10 into fresh DMM without washing and allowed to reach stationary phase  
622 before being transferred again. Each transfer allowed contaminating nutrients that were either  
623 intracellular, bound to the cell surface or carried along with culture supernatant to be diluted into  
624 fresh medium, and then diluted by redistribution amongst actively growing cells within the  
625 population. All four isolates were able to be serially transferred ten times in DMM without a loss  
626 in final yield (**Figure 5**). Cultures were not shaken during these experiments and thus endpoint  
627 OD<sub>595</sub> readings did exhibit some fluctuation due to cell clumping and biofilm formation. Linear  
628 regression analysis demonstrated that the slope of each fit to final OD<sub>595</sub> values was positive, which  
629 indicated that final yield did not decrease during successive transfers. The linear fit was tested for  
630 significant deviation from zero, and all isolates exhibited p-values >0.22, which indicated that the

631 slopes of the linear fits were not significantly different from zero. Taken together these data  
632 confirmed that liquid DMM was indeed sufficient to meet the growth needs for the *Dysgonomonas*  
633 isolates used here. Although we tested *Dysgonomonas* isolates with diverse phylogenetic  
634 placement, it is possible that other strains may exhibit auxotrophy for specific amino acids or  
635 vitamins. Using DMM as a basal minimal medium to perform further amino acid or cofactor  
636 auxanography will allow simple and quick elucidation of any alternate growth requirements.  
637

### 638 **Growth kinetics in DCM & DMM**

639 To create a parallel complex media, we amended DDM (B-vitamin replete) with 1% v/v each of  
640 peptone and yeast extract to create DCM and established a baseline for the expected growth  
641 kinetics in these media. Each *Dysgonomonas* isolate was grown in DMM broth, washed, diluted  
642 and subcultured into either DMM or DCM broth and grown to stationary phase. These pre-growth  
643 cultures were again washed and diluted into the same or opposite media and incubated aerobically  
644 and anaerobically. Aerobically, as expected, all isolates exhibited faster growth rates and higher  
645 yield when grown in DCM than in DMM, regardless of the pre-growth medium used (**Figure 6**).  
646 Under anaerobic conditions, isolates also achieved greater final yield when grown in DCM rather  
647 than DMM, though there was variability between isolates regarding which pre-growth medium  
648 allowed the greater yield. These results are unsurprising given reduction in biosynthetic costs of  
649 amino acids, vitamins and cofactors provided by the amendments in DCM. Isolates pre-grown in  
650 DMM and switched to DCM performed near identically to DCM pre-grown cultures in all cases  
651 under aerobic conditions, displaying identical yields and only slight differences in growth rates  
652 (**Table 1**). During anaerobic growth there was again variability between isolates with respect to  
653 which pre-growth medium resulted in greater final yield. Aerobic cultures pre-grown in DCM and  
654 switched to DMM exhibited slightly greater growth rates for all isolates except for GY75, for  
655 which DMM-conditioned cells displayed the greater rate. Final yields in DMM during anaerobic  
656 growth differed based on pre-growth medium between the isolates, with isolate BGC7 and isolate  
657 GY75 displaying greater yield when pre-growth occurred in DCM, while isolate HGC4 and  
658 GY617 displayed greater yield when pre-growth occurred in DMM. Perhaps unexpectedly, the  
659 switch from DCM to DMM did not elicit an observable lag phase during aerobic growth, which  
660 suggested that gene expression related to growth and cell division can shift rapidly following  
661 transfer between the two media. Within media types, carrying capacities of the media were highly

662 consistent across isolates and allowed stable population kinetics during stationary phase to at least  
663 96 hours.

#### 664 **Growth on agar-solidified media**

665 Growth of *Dysgonomonas* isolates on DDM or DMM solidified with 1.5% w/v agar resulted in  
666 delayed and overall weak growth when incubated aerobically, while plates incubated anaerobically  
667 exhibited good colony growth (author observation). Due to differences in exposure to ambient  
668 atmosphere between cultures grown on solid media versus liquid culture, oxidative stress was  
669 suspected as a growth-limiting factor on our solid, defined medium. As described by Dione et al.  
670 [79], we amended agar-solidified DDM with a single antioxidant (ascorbic acid, uric acid or  
671 glutathione) and adjusted pH to 7.5. Isolates were streaked onto each medium, loosely bagged and  
672 incubated aerobically. Each antioxidant alone was sufficient to permit aerobic growth on agar-  
673 solidified DDM (**Figure 7**). Due to the characteristics of aqueous solutions of ascorbic and uric  
674 acid, media required additional pH amendments using concentrated NaOH or HCl. Both ascorbic  
675 acid and uric acid changed the hue of the medium to an orange or green-grey color, respectively,  
676 which may be inhibitory for some biochemical or genetic analyses. Additionally, the presence of  
677 uric acid caused colonies from some isolates to exhibit umbonate morphology (**Figure 7, insets**).  
678 Glutathione did not contribute to visible changes in the media or to alterations in colony  
679 morphology, and was selected for final media formulations. Addition of ascorbic acid, glutathione  
680 or uric acid to liquid media did not significantly alter growth phenotypes in liquid media, with the  
681 exception that ascorbic acid lowered growth rate and yield for isolate BGC7 (not shown).  
682 Additionally, the *Dysgonomonas* isolates tested did not utilize L-cysteine, ascorbic acid, uric acid  
683 or glutathione as a sole source of carbon in DMM (not shown).

684 To create a parallel complex solid medium, agar-solidified DCM was also amended with  
685 glutathione and incubated loosely bagged under common laboratory conditions. Expected growth  
686 phenotypes were observed from all isolates on solid DCM after 3 days of incubation under all  
687 conditions with the exception that isolates BGC7 and GY75 grew somewhat slower aerobically at  
688 22°C than did the other isolates and required an additional day of incubation (**Figure S8**).  
689 Importantly, the creation of DCM, particularly when solidified in the presence of an antioxidant,  
690 abolishes the requirement for animal blood when growing *Dysgonomonas*, which may be a  
691 limiting factor for some research groups.

692 When incubated under aerobic conditions, cultures on solid DMM containing glutathione still

693 exhibited unimpressive growth compared to that on DDM, and we speculated that the presence of  
694 excess B-vitamins could have contributed to maintaining a reduced intracellular environment  
695 during growth on solid DDM. To determine if additional protection from oxidative stress was  
696 required, we grew aerobic cultures on solid DMM containing glutathione and incubated plates  
697 aerobically, with either unrestricted access to ambient atmosphere (un-bagged plates) or with  
698 restricted access to ambient atmosphere (sealed tightly in a plastic bag) (**Figure S9**). Colonies from  
699 plates that were un-bagged displayed sparse growth with small colonies which never reached the  
700 size of those grown on DDM under similar conditions. In contrast, colonies from plates that were  
701 incubated in sealed plastic bags exhibited the typical colony phenotype observed on DDM. We  
702 suspect that restricting access to ambient atmosphere could provide several advantages for growth  
703 of *Dysgonomonas*; (i) moisture from the media is retained during extended incubation; (ii) oxygen  
704 is likely consumed during aerobic respiration faster than it can be replaced in a sealed plastic bag,  
705 creating microaerophilic conditions with reduced oxidative pressure; (iii) the buildup of volatile  
706 metabolic end products such as carbon dioxide may provide beneficial conditions for growth, as  
707 has been demonstrated for several *Dysgonomonas* spp. [9].

#### 708 **Enrichment of *Dysgonomonas* isolates from termite hindgut**

709 In addition to providing access to ‘cleaner’ physiological and genetics studies, we were interested  
710 to determine if DMM could be used to selectively enrich for *Dysgonomonas* from environmental  
711 samples. We collected worker and alate termites from the same colony during a swarming event  
712 and performed bacterial strain isolation, purification, high-throughput V4 16S rRNA gene  
713 screening and ASV generation as described in Materials and Methods. Thirteen isolates  
714 representative of four ASV-groups (**Table S4**) were selected for full-length 16S rRNA genes  
715 sequencing alongside isolates BGC7, HGC4, GY75 and GY617. We reconstructed a 16S rRNA  
716 gene maximum-likelihood phylogeny containing genes from our own isolates and those from other  
717 cultured members of *Dysgonomonas* and overlaid ASV-group and isolation source metadata  
718 (**Figure 8**). Our small collection of *Dysgonomonas* isolates displayed congruency between ASV  
719 groups and full length 16S rRNA gene sequences; that is, all full-length 16S gene sequences from  
720 our isolates were also clustered by ASV group. Representative genes obtained from sequence  
721 databases that shared 100% identity to, and over the entire length of, our ASVs were considered  
722 part of an ASV-group, even if there was disparity between full-length sequences. Sequences in  
723 ASV-group 3\* represent a subset of 16S rRNA genes from species which were not isolated or used



724 in this study but are identical over the ~250 bp of the V4 region of 16S rRNA gene that is used to  
725 generate ASVs. ASV-group 5 contained only the sequence derived from isolate BGC7, we did not  
726 obtain any novel isolates with this ASV during this work.

727 *Dysgonomonas* isolates that belonged to ASV-group 1 also shared 100% identity between full-  
728 length 16S rRNA gene, which included the type strain *D. gadei* (NR\_113134.1). Interestingly, we  
729 obtained ASV-group 1 isolates from worker and alate hindguts that shared 100% identity with  
730 GY75, which was isolated 21 months previous from the same colony. ASVs from isolates within  
731 ASV-group 4 shared 98% identity to that of ASV-group 1 (5 substitutions) and clustered separately  
732 with *Dysgonomonas termitidis* (AB971823.1) to the exclusion of ASV-group 1 members, based  
733 on full-length 16S gene sequences. Full-length sequences belonging to ASV-group 4 shared 98.3%  
734 identity with *D. termitidis* and 98.0% identity to those sequences comprising ASV-group 1,  
735 representing what could be a novel species (**Files S1 & S2**). Isolates that belonged to ASV-group  
736 2 contained isolate HGC4, isolate GY617, five additional isolates from worker and alate hindguts  
737 (WAn2, WAn3, AAn4, AAn7 & AAn9), sp. zg-930 (MN933917.1) and *D. alginatilytica*  
738 (NR\_137388.1), although *D. alginatilytica* clustered separately based on full-length 16S gene  
739 sequence. All termite-derived sequences within ASV-group 2 from this work share >99.9%  
740 identity, exhibiting only 1-2 bp substitutions along the full-length 16S gene and together shared  
741 >99.9% identity to isolate HGC4, which was isolated from *R. flavipes* termites by a separate  
742 laboratory several years prior to our study. Moreover, isolates WAn2 and WAn3 showed 100%  
743 identity along the full-length 16S rRNA gene sequence with isolate GY617, which was isolated  
744 twenty-one months prior at the same timepoint and from the same termite colony as GY75.

745 That isolates belonging to ASV-groups 1 and 2 were obtained from worker hindguts from the same  
746 colony over multiple seasons, and that isolates belonging to both of these ASV-groups are also  
747 able to be obtained from actively-swarming alate hindguts (also from the same termite colony),  
748 suggested that these particular strains of *Dysgonomonas* may be stable members of the termite  
749 hindgut community within this colony. This is supported by ASV analysis of data from [47]  
750 (PRJEB5527) and [100] (PRJEB20463) (conducted using the same methods as described in  
751 Materials & Methods) which contained ASVs from termite hindguts within geologically distinct  
752 locations across New England which were identical to those found in ASV-groups 1, 2 and 4 from  
753 our study (data not shown). Additionally, recent work from our lab [101] which used hindgut DNA  
754 from worker termites trapped from the same colony as used in this study, identified



755 Bacteroidetes\_ASV008, which was associated with several species of eukaryotic protists, to be  
756 identical to the independently generated ASV\_4 from this study. Although the diversity of  
757 *Dysgonomonas* ASVs in sequencing data from termites suggests many strains are likely acquired  
758 horizontally from the environment, our finding that isolates from ASV-groups 1, 2 and 4 contain  
759 members isolated from both workers and alates may point to the possibility that some strains of  
760 *Dysgonomonas* could gain a competitive advantage in the termite hindgut by being vertically  
761 transmitted to new founder populations via alates.

762 Although studies have shown that high-throughput sequencing of full-length 16S rRNA genes can  
763 provide within-species resolution [102], here we have only provided representative sequences  
764 pertaining to dominant clones from 16S rRNA gene libraries for each organism. As such, we also  
765 do not intend our phylogenetic reconstruction to delimit species or strains. Additionally, we found  
766 that isolates which shared ASVs (and in the case of *D. gadei*, 100% similarity over >1.4kb  
767 fragments of the 16S rRNA gene) were found in vastly different environments. For example, ASV-  
768 group 1 contains sequences from isolates obtained from termite and human sources; ASV-group  
769 3\* contains isolates from sludge, microbial fuel cells, aquatic and human sources. It would simple,  
770 but incorrect, to imply that ASV groups were correlated with natural reservoir, genomic content  
771 or metabolic function, and we do not intend to convey this point.

772 The use of solid DMM to culture *Dysgonomonas* isolates distributed widely across a 16S rRNA  
773 gene phylogeny demonstrates that our chemically defined media are broadly applicable and are  
774 likely suitable and otherwise easily amenable for the growth of most strains of *Dysgonomonas*.

## 775 **Conclusion**

776 Although *Dysgonomonas* are considered fastidious organisms, their minimal requirements for  
777 growth are quite simple. The termite-hindgut derived and phylogenetically diverse *Dysgonomonas*  
778 isolates tested in this work exhibit requirements for L-cysteine, ferric hemin, biotin, thiamine and  
779 nearly all required cyanocobalamin. Our isolates exhibit preference for media containing  
780 ammonium and sulfate and required additional antioxidants when growing aerobically on solid  
781 media.

782 Robust growth on minimal medium is the cornerstone for many physiological and genetic studies  
783 using bacteria, and during preparation of this manuscript we were able to further utilize DMM to  
784 screen for naturally occurring nucleotide, amino acid and vitamin auxotrophies, examine resistance

785 phenotypes to antibiotics of interest and observe growth phenotypes using specific animal- and  
786 plant-derived carbon sources, including polysaccharides associated with lignocellulose  
787 (manuscripts in preparation). The media formulations described here provide robust and reliable  
788 growth in complex, defined or minimal variations that limit animal-derived components and  
789 laboratory equipment such as anaerobic chambers. These media can be used in liquid culture, or  
790 agar-solidified under both aerobic or anaerobic conditions. The results from this work provide  
791 three different, but parallel, media for the growth of members of genus *Dysgonomonas* and will  
792 aid in facilitating further physiological and genetic characterizations to determine their functional  
793 roles within particular ecological systems.

## 794 **Acknowledgements**

795 We gratefully acknowledge Dr. Joerg Graf and Dr. Michael C. Nelson for providing  
796 *Dysgonomonas* spp. BGC7 and HGC4, and Dr. Michael Stephens for assistance with DADA2.

## 797 **Competing interest statement**

798 The authors declare no competing interests.

## 799 **Funding source declaration**

800 This work was supported by the National Science Foundation Emerging Frontiers in Research  
801 and Innovation: Multicellular and Inter-Kingdom Signaling (EFRI-MIKS) award #1137249 to  
802 DJG.

803 **Figure & table legends:**

804 **Figure 1. Growth of *Dysgonomonas* isolates in defined medium containing amino acids and**  
805 **B-vitamins.** *Dysgonomonas* isolates BGC7 (A), HGC4 (B), GY75 (C) or GY617 (D) grown in 1X  
806 M9 salts supplemented with 5% v/v hemin solution, 5% v/v WVS, 0.5% v/v WMS 0.5% w/v D-  
807 glucose, 50 µg/ml kanamycin sulfate, pH 7.5. Amendments are shown in the legend in panel A.  
808 Error bars represent standard error of the mean (n=2).

809  
810 **Figure 2. L-cysteine is required for aerobic and anaerobic growth.** *Dysgonomonas* isolates  
811 BGC7 (A), HGC4 (B), GY75 (C) or GY617 (D) were pre-grown in DDM and diluted into sulfate-  
812 replete medium (1X M9 salts, 0.01% mWMS, 10% v/v hemin solution, 5% v/v WVS, 0.5% w/v  
813 D-glucose, pH 7.5; 1mM total sulfate) or sulfate-limited medium (1X M9 salts with 1mM MgCl<sub>2</sub>  
814 replacing MgSO<sub>4</sub>, 0.01% WMS, 10% v/v hemin solution, 5% v/v WVS, 0.5% w/v D-glucose, pH  
815 7.5; 83 nM total sulfate). Media contained either 0 or 1.7 mM L-cysteine as stated. Kanamycin  
816 sulfate was omitted for all conditions. Insets show final corrected OD<sub>595</sub> under anaerobic  
817 conditions; the y-axis is in linear units. L-cysteine and sulfate combinations can be found in the  
818 legend in panel A. Error bars represent standard error of the mean (n=2)

819  
820 **Figure 3. Ferric hemin is a preferred source of iron for *Dysgonomonas*.** Isolates BGC7 (A),  
821 HGC4 (B), GY75 (C) or GY617 (D) were pre-grown in DDM washed and diluted into 1X M9  
822 salts supplemented with 1% v/v WMS, 0.5% w/v D-glucose, 1.7 mM L-cysteine, 50 µg/ml  
823 kanamycin sulfate, pH 7.5, and contained iron sources according to the legend in panel A. Insets  
824 show final corrected OD<sub>595</sub> under anaerobic conditions; the y-axis is in linear units. Error bars  
825 represent standard error of the mean (n=2).

826  
827 **Figure 4. *Dysgonomonas* exhibit growth requirements for thiamine, biotin and**  
828 **cyanocobalamin.** *Dysgonomonas* isolates BGC7 (A), HGC4 (B), GY75 (C) or GY617 (D) were  
829 pre-grown in DDM lacking vitamins, washed and diluted into 1X M9 salts supplemented with 1%  
830 v/v WMS, 0.5% w/v D-glucose, 1.7 mM L-cysteine, 10% v/v hemin solution, 50 µg/ml kanamycin  
831 sulfate, pH 7.5, containing 0.41 µM biotin, 0.74 µM thiamine, 3.7 nM cyanocobalamin and 0.67  
832 mM L-methionine and amended as described in the legend in panel A. Insets show final corrected

833 OD<sub>595</sub> under anaerobic conditions; the y-axis is in linear units. Error bars represent standard error  
834 of the mean (n=2).

835  
836 **Figure 5. Serial transfer of *Dysgonomonas* in DMM liquid cultures.** Cultures were grown to  
837 stationary phase in DMM and diluted 1:10 into fresh DMM media and again allowed to reach  
838 stationary phase. Cultures underwent a total of 10 serial transfers, where transfer #0 represents  
839 inoculation from complex medium. Error bars represent standard error of the mean (n=2). Slopes  
840 and their associated p-values (representing significant deviation from zero) for the endpoint  
841 readings were generated using linear regression analysis in Prism8.

842  
843 **Figure 6. Comparison of growth phenotypes in complex and minimal media.** Isolates were  
844 pre-grown to stationary phase in either complex (DCM) or minimal (DMM) media and transferred  
845 separately into the same or opposite media. Cultures were grown in triplicate to stationary phase  
846 aerobically or anaerobically. Pre-growth and growth combinations are located in the legend in  
847 panel A. Insets show final corrected OD<sub>595</sub> under anaerobic conditions; the y-axis is in linear units.  
848 Error bars represent standard error of the mean (n=3). Growth rates and carrying capacity were  
849 measured using the R package Growthcurver, and results are reported in **Table 1**.

850  
851 **Table 1. Aerobic growth metrics in DCM and DMM.** Isolates were inoculated from solid  
852 complex media into DMM broth and allowed to reach stationary phase. Cultures were washed,  
853 diluted and subcultured into either DMM or DCM (DMM- or DCM-adjusted cultures) before being  
854 washed, diluted and used as inoculum for growth curves (Figure 10). Growth data were fit to the  
855 logistic growth model and metrics calculated using the R package Growthcurver. Reported values  
856 represent the mean ± standard error (n=3).

857  
858 **Figure 7. Antioxidants are required for aerobic growth on defined medium.** *Dysgonomonas*  
859 isolates BGC7, HGC4, GY75 and GY617 were grown on agar-solidified DDM containing: No  
860 supplemental antioxidants (A), 0.1 mg/ml glutathione (B), 1 mg/ml L-ascorbic acid (C), 0.32  
861 mg/ml uric acid (D). Overnight cultures were grown in DCM to stationary phase and washed and  
862 diluted to OD<sub>595</sub> of 0.1 and 20 µl spots were allowed to dry onto media before streaking to single  
863 colonies. Plates were loosely bagged and incubated aerobically at 22°C for 12 days. Photographs

864 were taken at 7 dpi (main panels) or 12 dpi (insets). Scale bars represent 10 mm (main panels) or  
865 5 mm (insets).

866

867 **Figure 8. Maximum-likelihood phylogenetic reconstruction of near-full length 16S rRNA**  
868 **gene sequences from cultured members of genus *Dysgonomonas*.** Sequences of length 1.2-1.5  
869 kb were acquired from RefSeq and GenBank and combined with quality-controlled sequences  
870 from *Dysgonomonas* isolates from this study. Nodes containing filled circles represent branch  
871 support values; small, medium or large node shapes represent 70%/85%, 80%/90% or 90%/95%  
872 SH-aLRT/UFBoot support, respectively. The scale bar represents 0.05 substitutions per site. Type  
873 strains are designated by a superscript 'T' following the strain designation. Isolates used or  
874 obtained in this study are bolded. Bolded *Dysgonomonas* isolates beginning with 'A' are derived  
875 from alates while those beginning with 'W' are worker-derived. Highlighted clades represent ASV-  
876 groups, which share common ASVs (contain 100% identity over the 250 bp sequence containing  
877 the V4 region of the 16S rRNA gene). *Dysgonomonas* spp. not obtained or used in this study were  
878 included as part of an ASV-group if they also exhibited 100% identity to ASVs generated in this  
879 study. ASV-group 3\* represents taxa which share 100% identity over the same 250 bp sequence of  
880 16S rRNA gene, but were not true ASVs generated in this study. Square tip points are colored by  
881 isolation source according to the legend. Source category 'Other' contains *Dysgonomonas* isolates  
882 from marmot (MT065889.1), bird (MT065888.1), crayfish (MN933917.1) and beetle  
883 (MN099400.1 & MN099399.1).

884

885 **Figure S1. Amino acid auxanography using defined medium.** Heat map of corrected growth  
886 measurements of *Dysgonomonas* isolates BGC7 (A), HGC4 (B), GY75 (C) or GY617 (D) at  
887 twelve-hour intervals. Isolates were grown in 1X M9 salts supplemented with 5% v/v hemin  
888 solution, 5% v/v WVS, 0.5% v/v WMS, 0.5% w/v D-glucose, 50 µg/ml kanamycin sulfate, pH 7.5,  
889 amended with a single combinatorial amino acid pool, with each amino acid at 0.33 mg/ml. Amino  
890 acid pools are as follows: Pool 1: L-phenylalanine, L-serine, L-tryptophan, L-tyrosine, L-  
891 glutamine; Pool 2: L-alanine, L-cysteine, L-threonine, L-asparagine, L-methionine, DAP; Pool 3:  
892 L-arginine, L-ornithine, L-aspartic acid, L-proline, L-glutamic acid; Pool 4: L-leucine, glycine, L-  
893 isoleucine, L-histidine, L-lysine, L-valine; Pool 5: L-phenylalanine, L-alanine, L-arginine, L-  
894 leucine; Pool 6: L-serine, L-cysteine, L-ornithine, glycine; Pool 7: L-tryptophan, L-threonine, L-

895 aspartic acid, L-isoleucine; Pool 8: L-tyrosine, L-asparagine, L-proline, L-histidine; Pool 9: L-  
896 methionine, L-glutamic acid, L-lysine; Pool 10: L-glutamine, DAP, L-valine, and can also be found  
897 in **Table S1**.

898

899 **Figure S2. Amino acid auxanography.** Growth curves of *Dysgonomonas* isolates BGC7 (A),  
900 HGC4 (B), GY75 (C) or GY617 (D) in 1X M9 salts supplemented with 5% v/v hemin solution,  
901 5% v/v WVS, 0.5% v/v WMS, 0.5% w/v D-glucose, 50 µg/ml kanamycin sulfate, pH 7.5, amended  
902 with a single combinatorial amino acid pool, with each amino acid at 0.33 mg/ml. Amino acid  
903 pools can be found in **Table S1**.

904

905 **Figure S3. Aerobic growth in defined medium is L-cysteine-dependent.** Growth of  
906 *Dysgonomonas* isolates BGC7 (A), HGC4 (B), GY75 (C) or GY617 (D) in 1X M9 salts  
907 supplemented with 5% v/v hemin solution, 5% v/v WVS, 1% v/v WMS, 0.5% w/v D-glucose, 50  
908 µg/ml kanamycin sulfate, pH 7.5. L-cysteine concentrations are shown in the legend in panel A.  
909 Insets show final corrected OD<sub>595</sub> under anaerobic conditions; the y-axis is in linear units.

910

911 **Figure S4. *Dysgonomonas* can utilize L-cysteine as the sole source of nitrogen.** *Dysgonomonas*  
912 isolates BGC7 (A), HGC4 (B), GY75 (C) or GY617 (D) washed and resuspended in 1X PBS and  
913 diluted into 1X M9 salts with or without ammonium chloride, supplemented with 1% v/v WMS,  
914 0.5% w/v D-glucose, 50 µg/ml kanamycin sulfate, pH 7.5, with and without 1.7 mM L-cysteine or  
915 L-methionine, as outlined in the legend in panel A. Insets show final corrected OD<sub>595</sub> under  
916 anaerobic conditions; the y-axis is in linear units. Error bars represent standard error of the mean  
917 (n=2).

918

919 **Figure S5. Aerobic growth is dependent on ferric hemin concentration.** *Dysgonomonas*  
920 isolates BGC7 (A), HGC4 (B), GY75 (C) or GY617 (D) were pre-grown in DDM without hemin,  
921 washed and diluted into 1X M9 salts supplemented with 5% v/v WVS, 1% v/v WMS, 0.5% w/v  
922 D-glucose, 1.7 mM L-cysteine, 50 µg/ml kanamycin sulfate, pH 7.5. ferric hemin amendments can  
923 be found in the legend in panel A.

924

925 **Figure S6. Anaerobic growth yield is dependent on ferric hemin concentration.**

926 *Dysgonomonas* isolates BGC7 (A), HGC4 (B), GY75 (C) or GY617 (D) were pre-grown on DDM  
927 lacking hemin, washed and diluted into 1X M9 salts supplemented with 5% v/v WVS, 1% v/v  
928 WMS, 0.5% w/v D-glucose, 1.7 mM L-cysteine, 50 µg/ml kanamycin sulfate, pH 7.5, and  
929 incubated anaerobically. Shown are the final growth yields (difference in OD<sub>595</sub> at  $t=0$ h and  $t=85$ h)  
930 across a range of hemin concentrations during anaerobic growth. Identical concentrations as in  
931 Fig. 5 were used to determine final yield. The data were fit using third order polynomial regression  
932 (solid line) and coefficients of determination for the fit are given as R<sup>2</sup> values as indicated.  
933 Confidence intervals of 95% are represented by shading bounded by dashed lines.

934

935 **Figure S7. Isolates exhibit multiple B-vitamin auxotrophies.** *Dysgonomonas* isolates BGC7  
936 (A), HGC4 (B), GY75 (C) or GY617 (D) were pre-grown in DDM lacking B-vitamins, washed  
937 and diluted into 1X M9 salts supplemented with 1% v/v WMS, 0.5% w/v D-glucose, 1.7 mM L-  
938 cysteine, 10% v/v hemin solution, 50 µg/ml kanamycin sulfate, pH 7.5, containing vitamin pools  
939 with all, none or a single cofactor omission, as outlined in the legend in panel A. Insets show final  
940 corrected OD<sub>595</sub> under anaerobic conditions; the y-axis is in linear units.

941

942 **Figure S8. Agar-solidified complex medium (DCM) supports growth under common**  
943 **incubation conditions.** *Dysgonomonas* isolates were streaked from solid DDM onto agar-  
944 solidified DCM containing 0.1 mg/ml reduced glutathione and streaked to isolation. Plates were  
945 loosely bagged, incubated aerobically at 22°C or 30°C or anaerobically at 22°C for 4 days and  
946 photographed. Scale bar represents 10 mm.

947

948 **Figure S9. Incubation in atmosphere-restricted conditions promotes growth on agar-**  
949 **solidified DMM containing antioxidants.** Several colonies of each *Dysgonomonas* isolate were  
950 taken from solid DDM and separately pooled in M9 salts, spotted and streaked onto agar-solidified  
951 DMM containing 0.1 mg/ml glutathione. Plates were incubated at 30°C with either unrestricted  
952 access (un-bagged) or restricted access (sealed in plastic bag) to ambient atmosphere for 5 days  
953 and photographed. Scale bar represents 5 mm.

954

955 **Table S1. Amino acid auxanography pools.** Twenty-two amino acids were prepared as aqueous  
956 10 mg/ml solutions. Ten pools were constructed such that concentrations of each component was



957 1.67 mg/ml. Pools were added to media such that final concentration of each amino acid was 0.33  
958 mg/ml.

959

960 **Table S2. Recipes for stock salt, metal and vitamin solutions.** Recipe for concentrated stock  
961 solutions are listed in mass per liter and molarity. Stock solutions can be prepared and safely stored  
962 at 4°C for weeks to months with minimal effect on growth. See references for WMS and WVS in  
963 Materials and Methods for preparation instructions.

964

965 **Table S3. Media recipes for DCM, DDM & DMM.** Media recipes for DMM, DDM and DCM  
966 are provided along with final concentrations in mass per liter and molarities. Suggestions for  
967 preparation are also provided, but we assume some knowledge and experience with media  
968 preparation.

969

970 **Table S4. ASVs generated from *Dysgonomonas* isolates used in this study.** Thirty isolates were  
971 obtained from worker and alate termites and purified on DMM. The V4 region of the 16S rRNA  
972 gene was amplified and sequenced using dual-barcoded primers on an Illumina MiSeq platform.  
973 The R package DADA2 was used to generate ASVs. Molecular-grade water was used as a no-  
974 template control, and *Dysgonomonas* spp. BGC7 and HGC4 as well as isolates GY75 and GY617  
975 were used as biological controls. Read counts less than 5 percent of the total attributed to a  
976 particular isolate were considered amplification or sequencing errors that passed filtering and  
977 disregarded. ASV\_3\* was not generated from high-throughput sequencing data, but was observed  
978 to represent a subset of dideoxy-sequenced 16S rRNA genes which share 100% similarity over the  
979 same V4 region as ASVs generated with DADA2 (see **Figure 13**).

980

981 **File S1. Multiple sequence alignment of 16S rRNA genes used in this study (FASTA format).**

982

983 **File S2. Pairwise nucleotide identities for 16S rRNA genes used in this study (CSV format).**

984 **Figures and tables:**

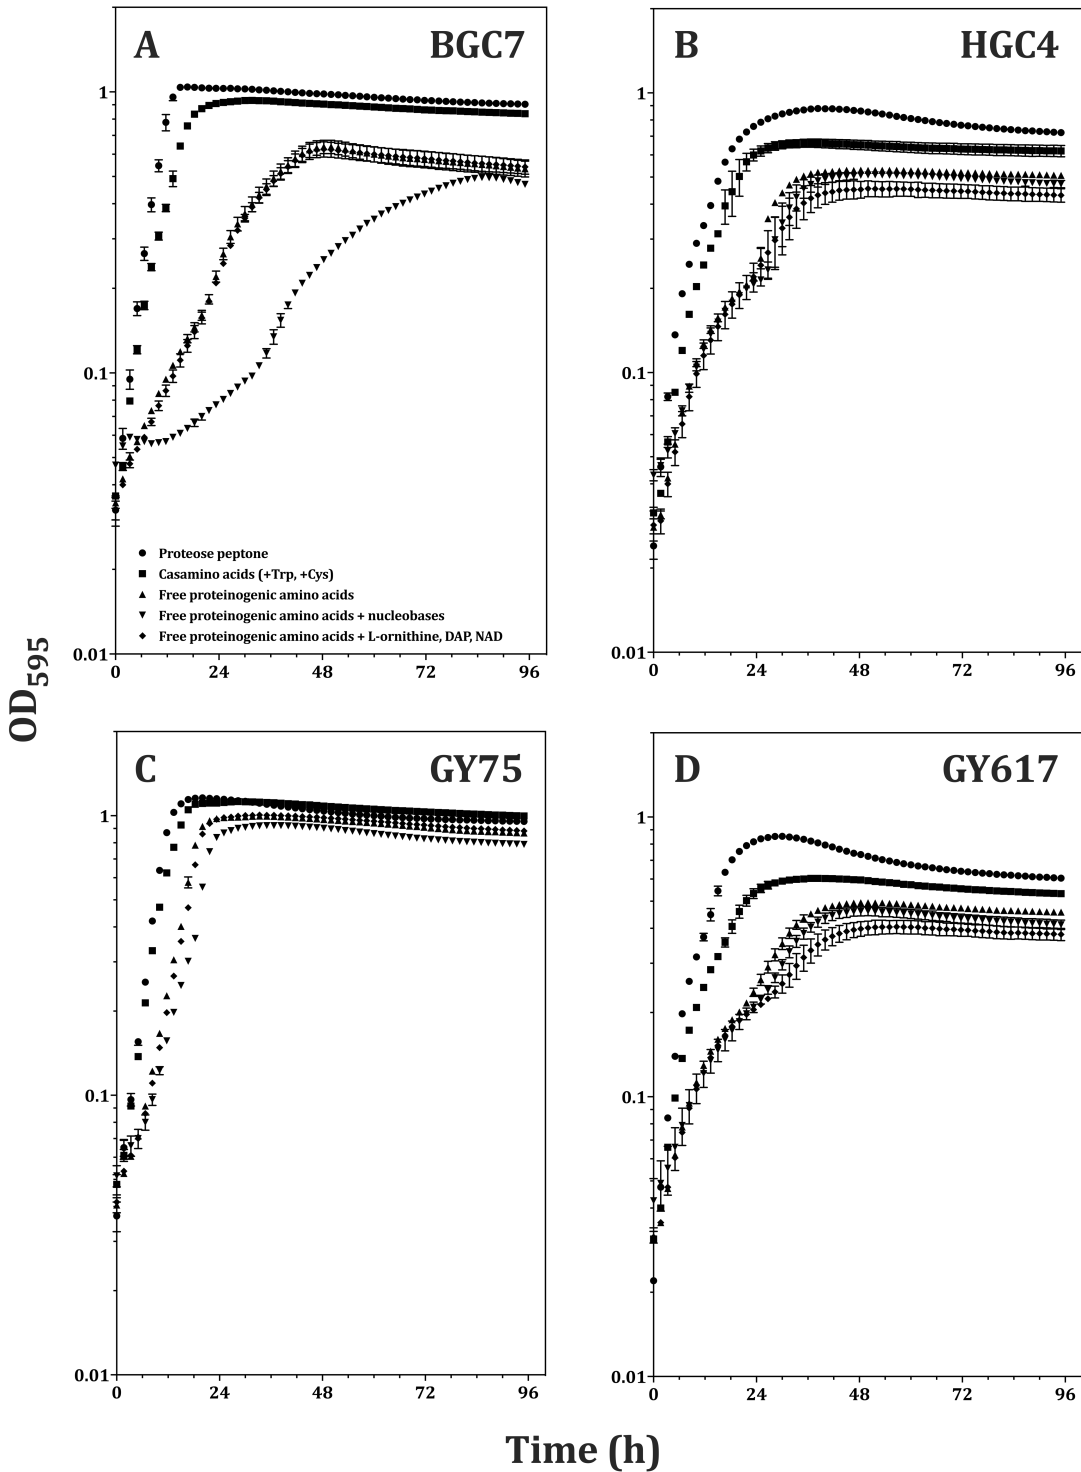

985

986 **Figure 1. Growth of *Dysgonomonas* isolates in defined medium containing amino acids and B-**  
987 **vitamins.**

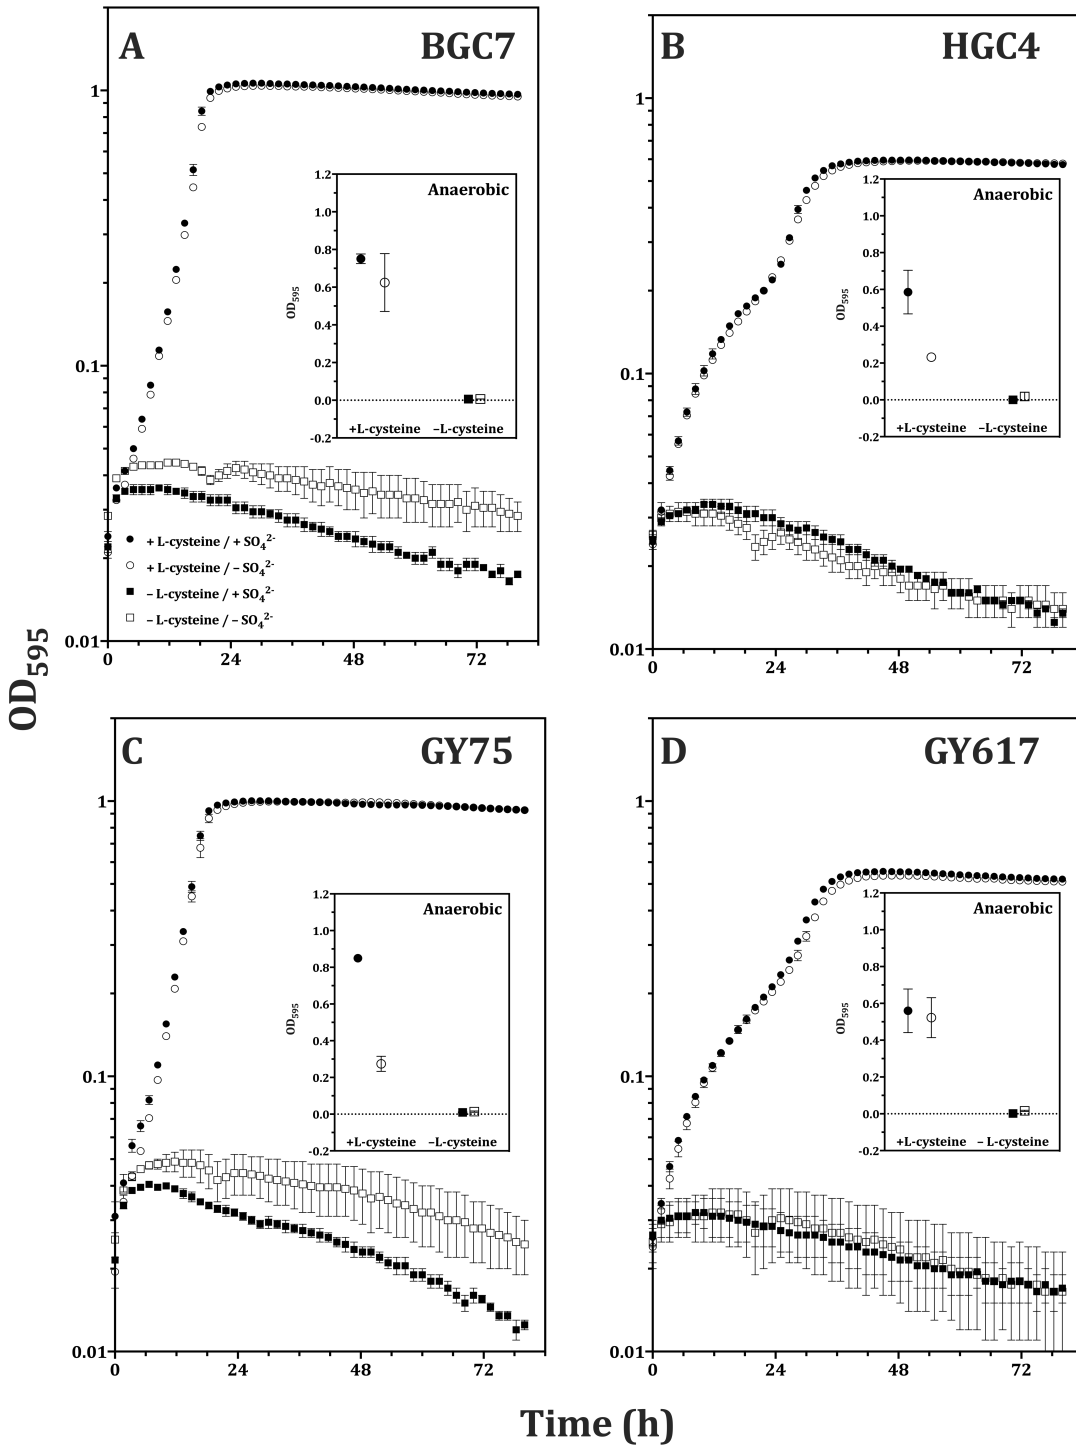

988

989 **Figure 2. L-cysteine is required for aerobic and anaerobic growth.**

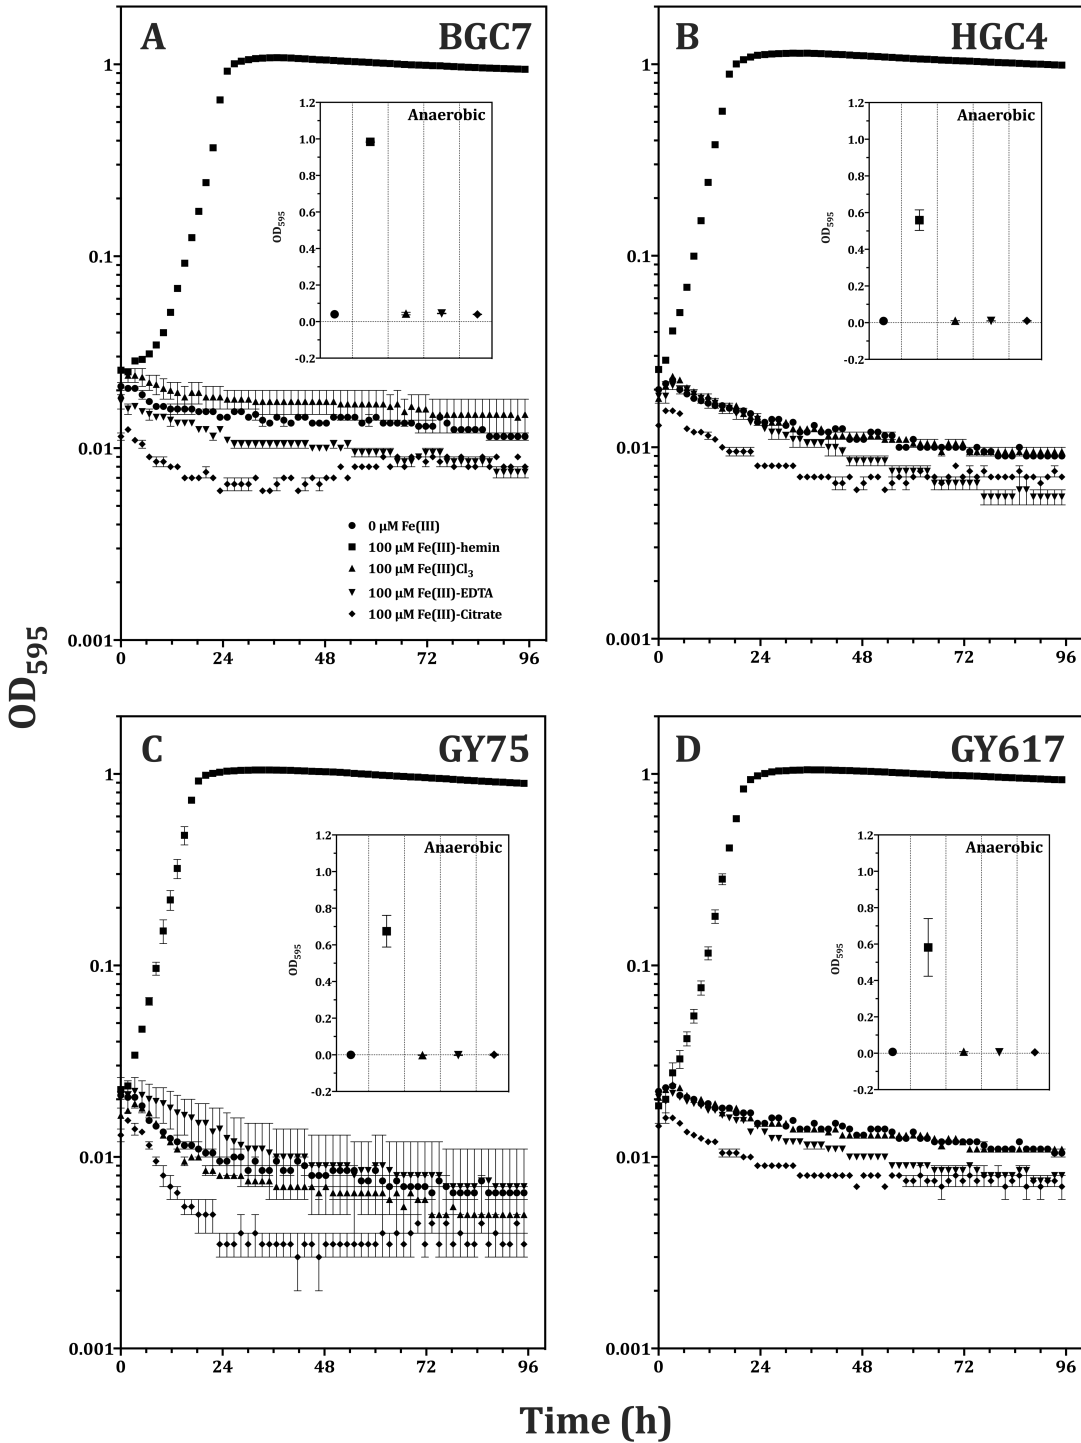

990

991 **Figure 3. Ferric hemin is a preferred source of iron for *Dysgonomonas***

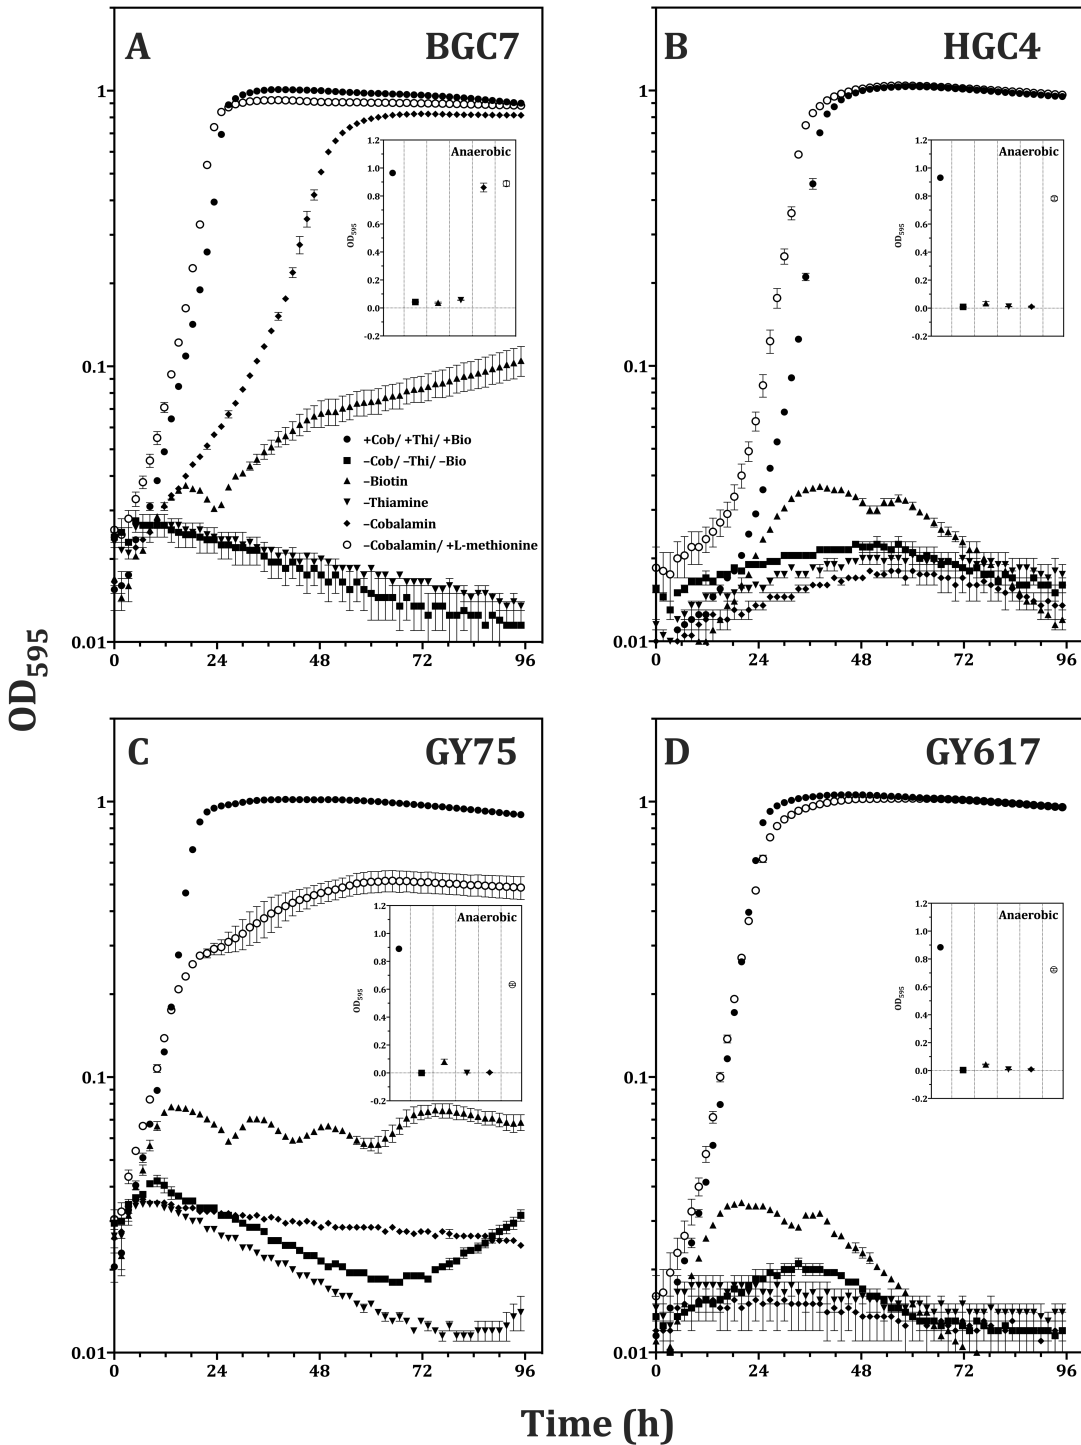

992

993 **Figure 4. *Dysgonomonas* exhibit growth requirements for thiamine, biotin and**  
994 **cyanocobalamin.**

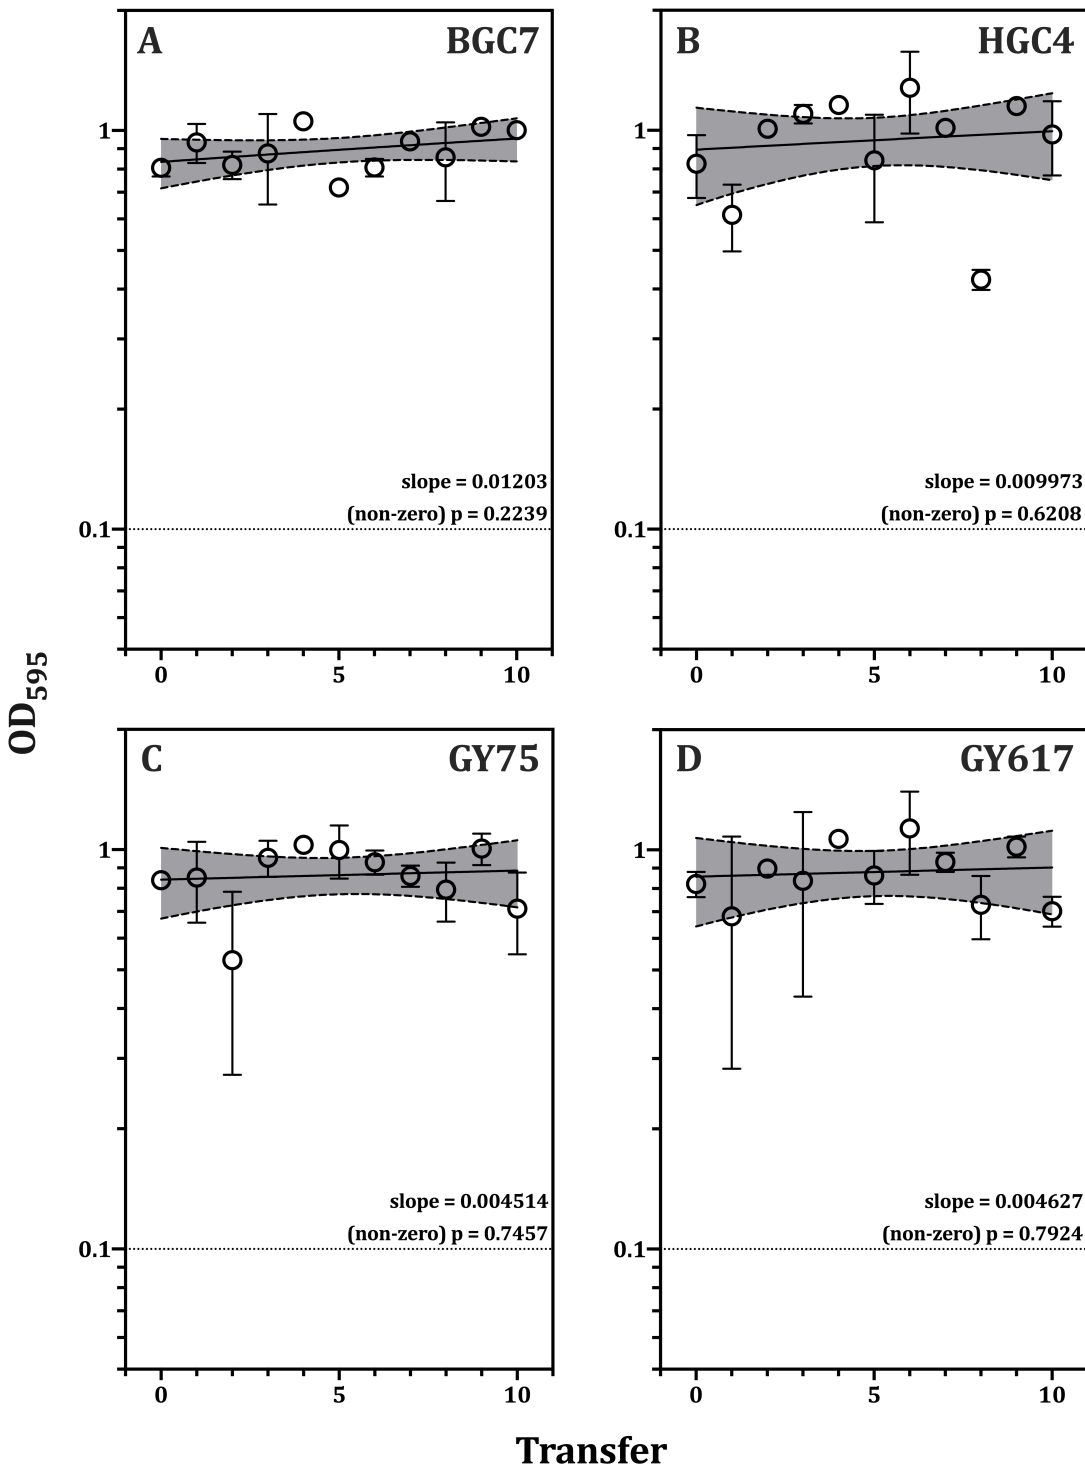

995

996 **Figure 5. Serial transfer of *Dysgonomonas* in DMM liquid cultures.**



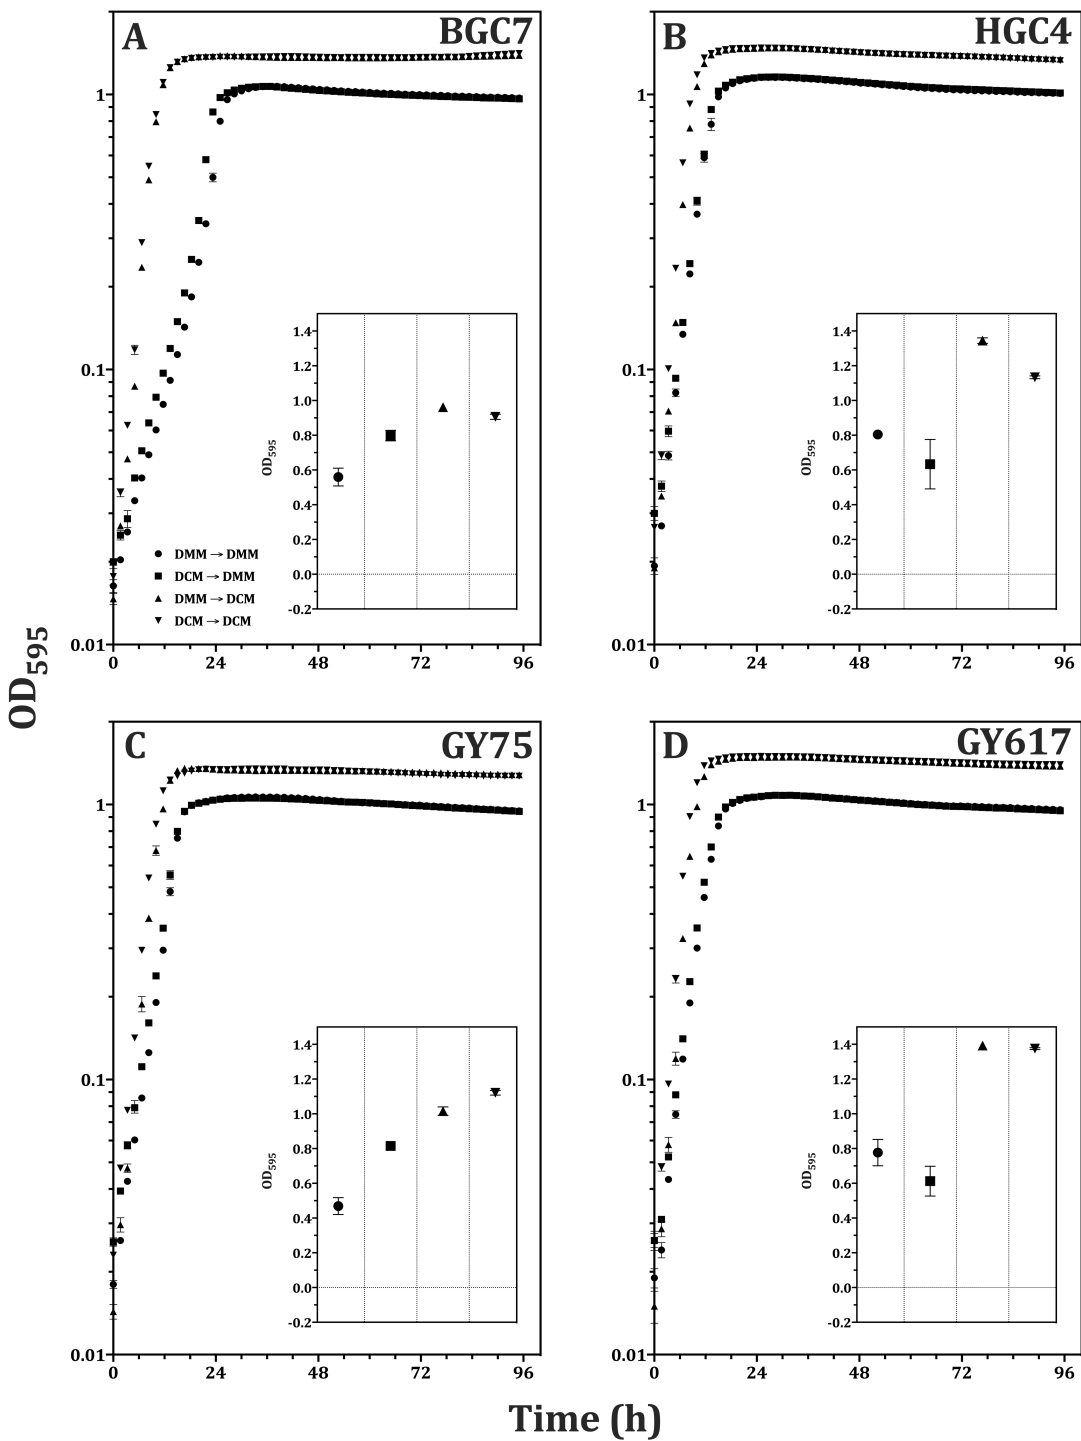

997

998 **Figure 6. Comparison of growth phenotypes in complex and minimal media.**

| Isolate | Pregrowth Medium | Growth Medium | Maximum growth rate (h <sup>-1</sup> ) | Generation time (h) | Carrying capacity (OD <sub>595</sub> ) |
|---------|------------------|---------------|----------------------------------------|---------------------|----------------------------------------|
| BGC7    | DMM              | DMM           | 0.454 ± 0.005                          | 1.53 ± 0.016        | 1.02 ± 0.005                           |
|         |                  | DCM           | 0.582 ± 0.003                          | 1.19 ± 0.005        | 1.37 ± 0.003                           |
|         | DCM              | DMM           | 0.483 ± 0.001                          | 1.44 ± 0.004        | 1.02 ± 0.004                           |
|         |                  | DCM           | 0.547 ± 0.016                          | 1.27 ± 0.038        | 1.37 ± 0.015                           |
| HGC4    | DMM              | DMM           | 0.513 ± 0.017                          | 1.35 ± 0.043        | 1.08 ± 0.006                           |
|         |                  | DCM           | 0.652 ± 0.005                          | 1.06 ± 0.008        | 1.42 ± 0.011                           |
|         | DCM              | DMM           | 0.530 ± 0.011                          | 1.31 ± 0.027        | 1.09 ± 0.003                           |
|         |                  | DCM           | 0.664 ± 0.013                          | 1.05 ± 0.020        | 1.41 ± 0.013                           |
| GY75    | DMM              | DMM           | 0.540 ± 0.007                          | 1.29 ± 0.016        | 1.02 ± 0.006                           |
|         |                  | DCM           | 0.617 ± 0.004                          | 1.12 ± 0.007        | 1.32 ± 0.015                           |
|         | DCM              | DMM           | 0.484 ± 0.002                          | 1.43 ± 0.007        | 1.01 ± 0.006                           |
|         |                  | DCM           | 0.572 ± 0.025                          | 1.22 ± 0.053        | 1.31 ± 0.019                           |
| GY617   | DMM              | DMM           | 0.460 ± 0.006                          | 1.51 ± 0.019        | 1.02 ± 0.010                           |
|         |                  | DCM           | 0.637 ± 0.001                          | 1.09 ± 0.001        | 1.44 ± 0.005                           |
|         | DCM              | DMM           | 0.462 ± 0.004                          | 1.50 ± 0.012        | 1.02 ± 0.006                           |
|         |                  | DCM           | 0.652 ± 0.002                          | 1.06 ± 0.003        | 1.45 ± 0.009                           |

999

1000 **Table 1. Aerobic growth metrics in DCM and DMM.**

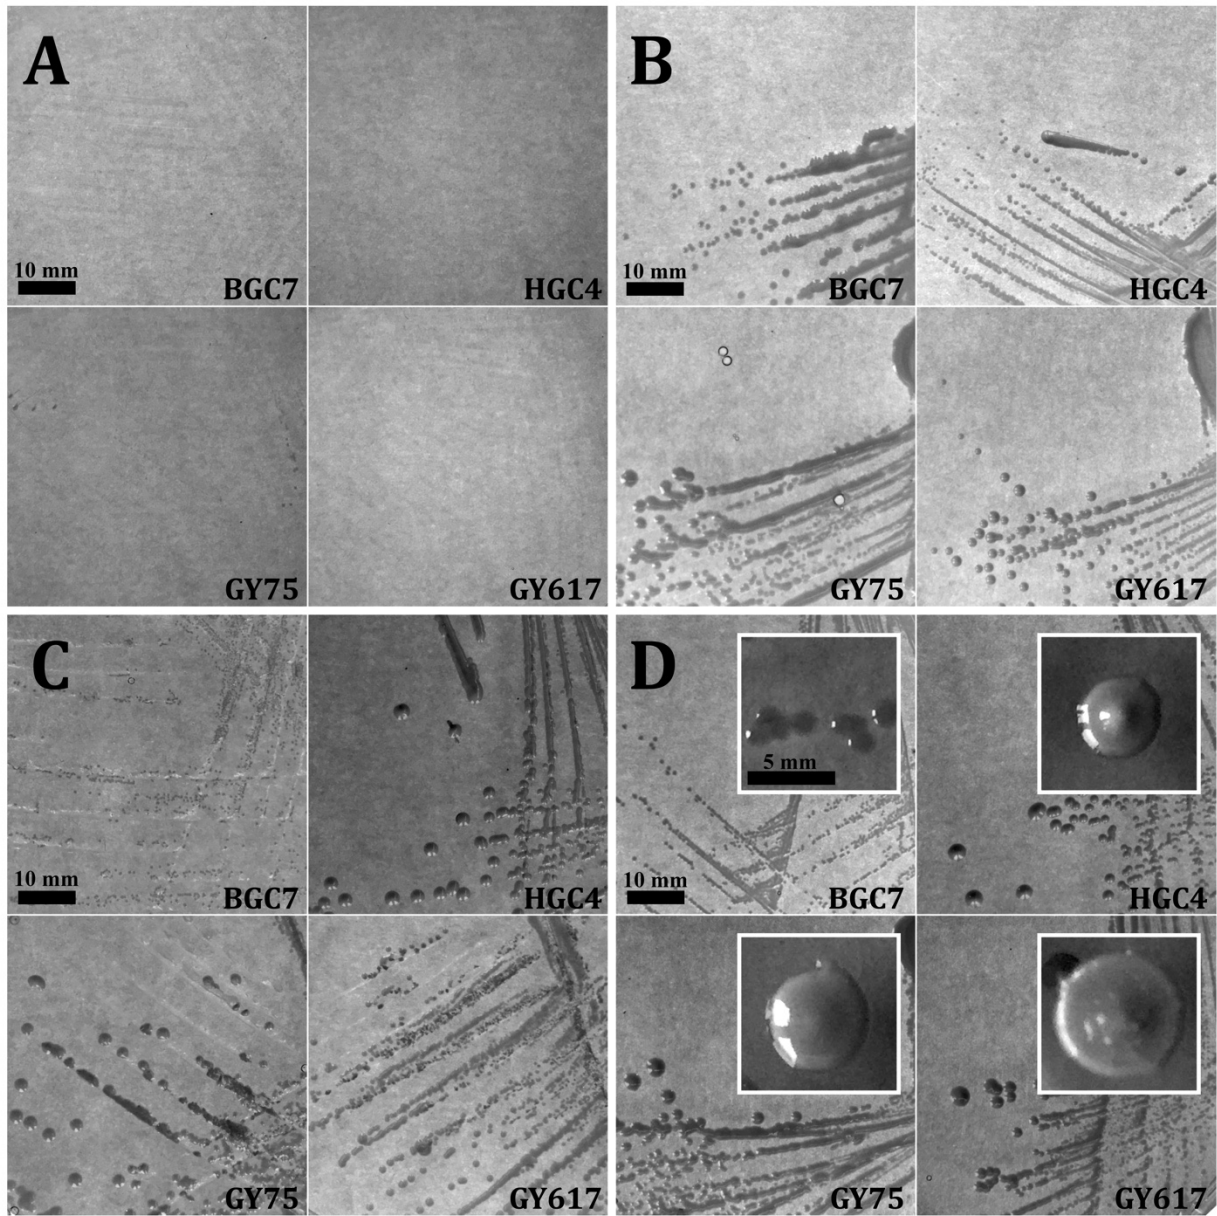

1001

1002

**Figure 7. Antioxidants are required for aerobic growth on defined medium.**

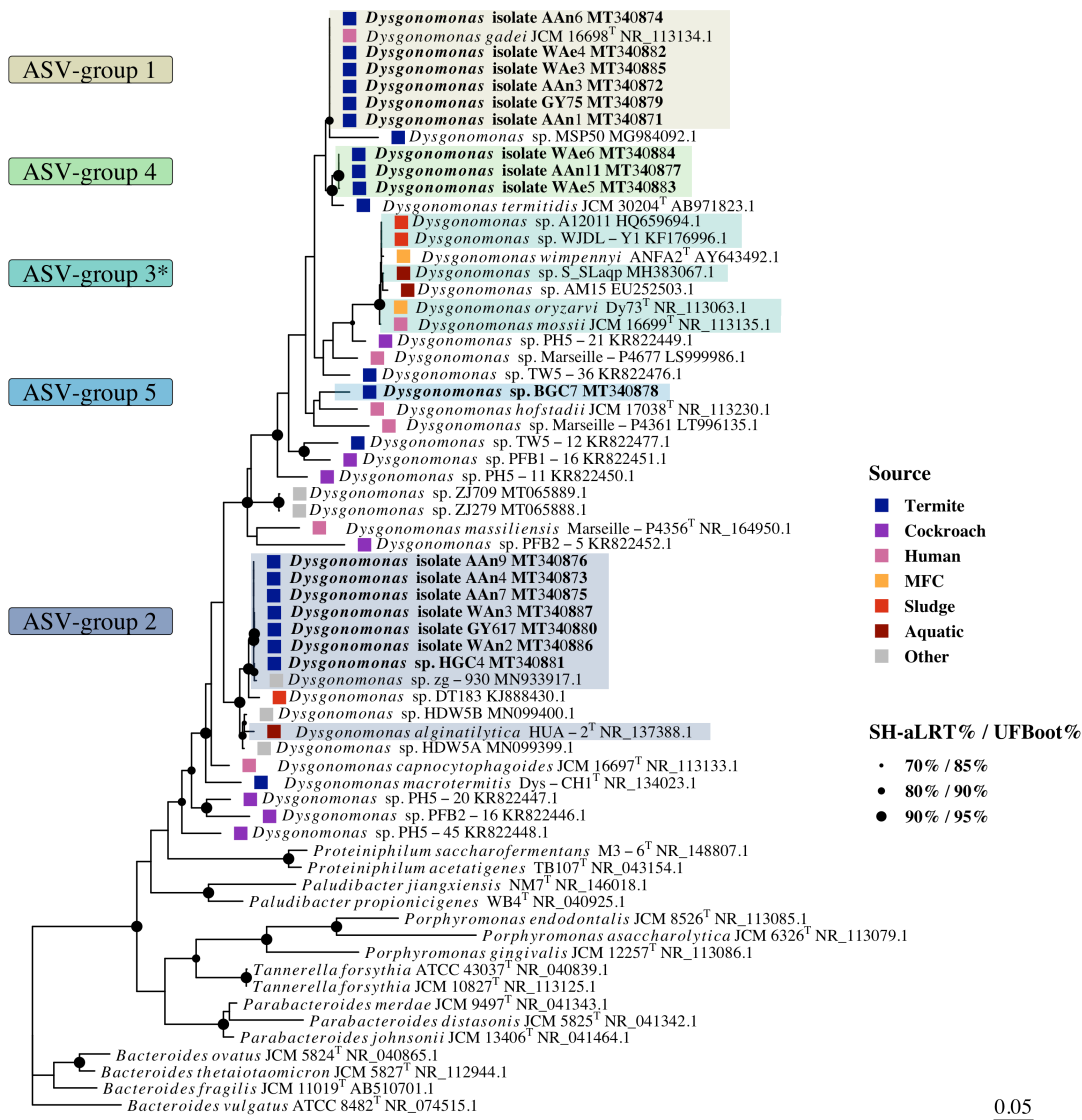

**Figure 8. Maximum-likelihood phylogenetic reconstruction of near-full length 16S rRNA gene sequences from cultured members of genus *Dysgonomonas*.**

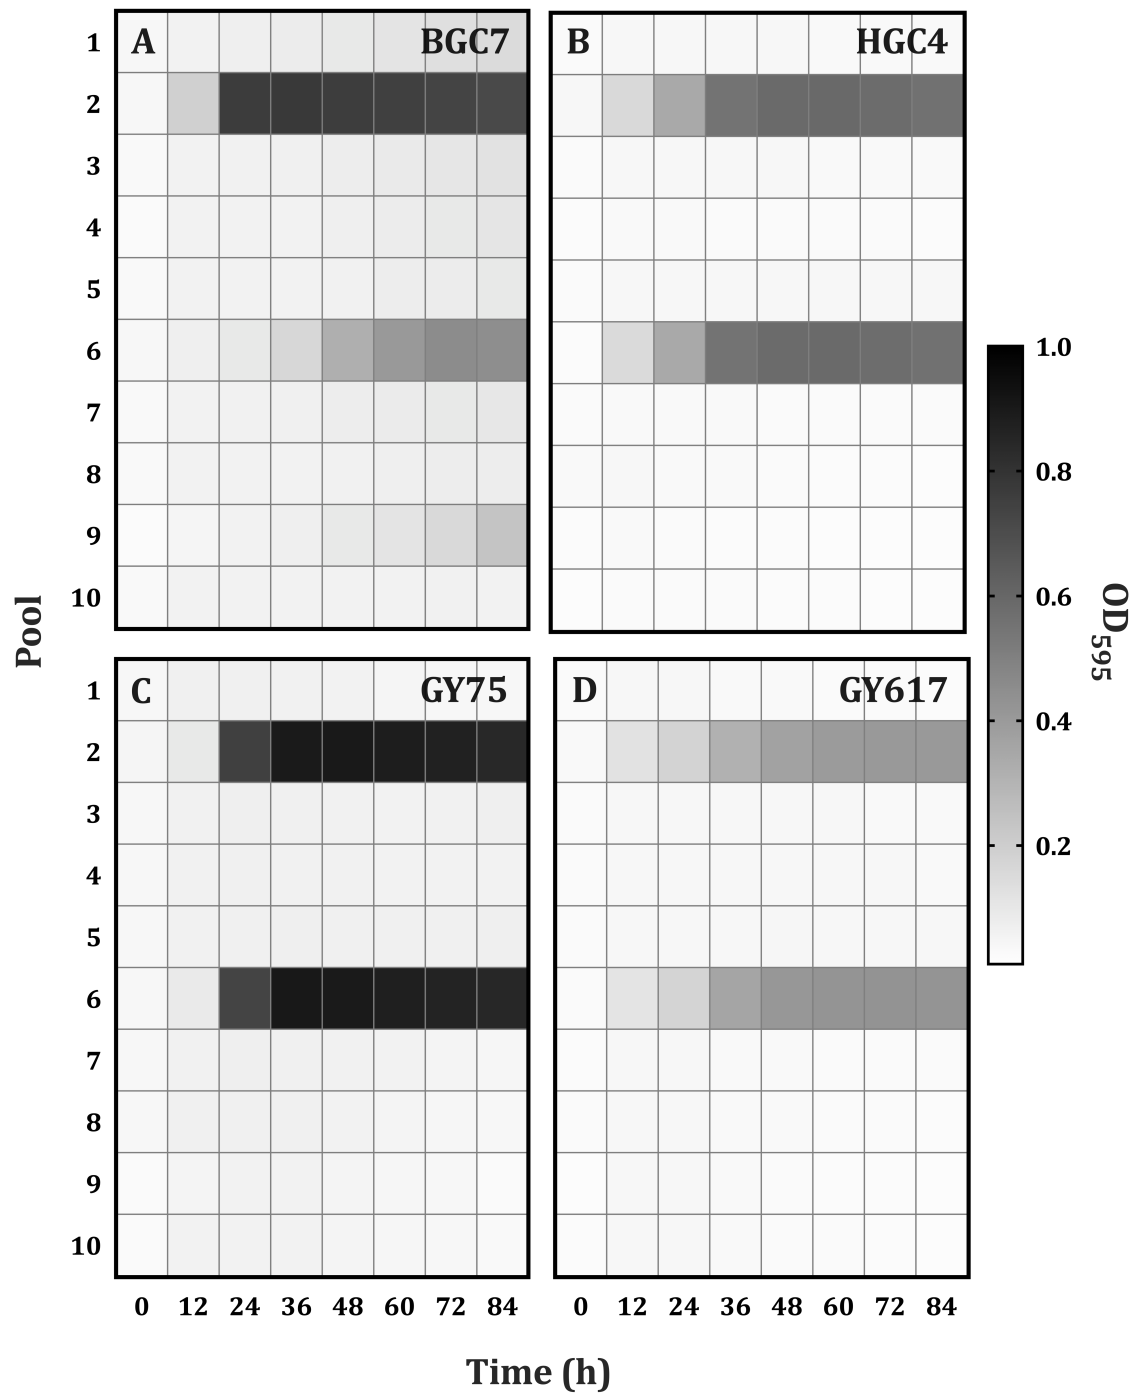

1006

1007 **Figure S1. Amino acid auxanography using defined medium.**

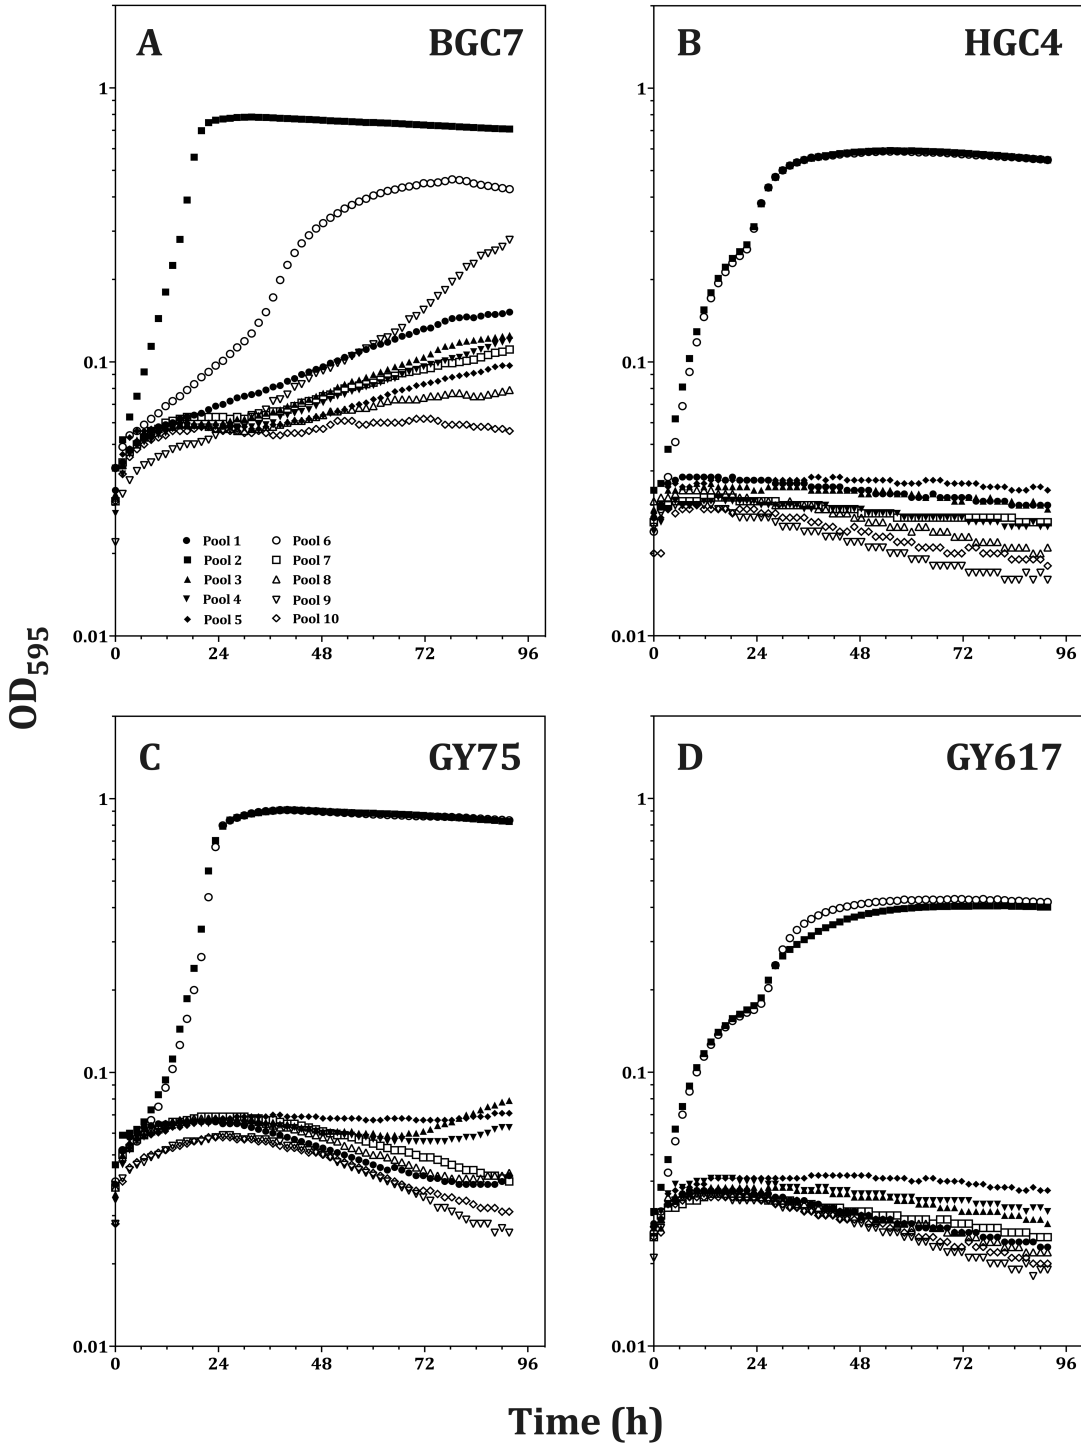

1008

1009 **Figure S2. Amino acid auxanography.**



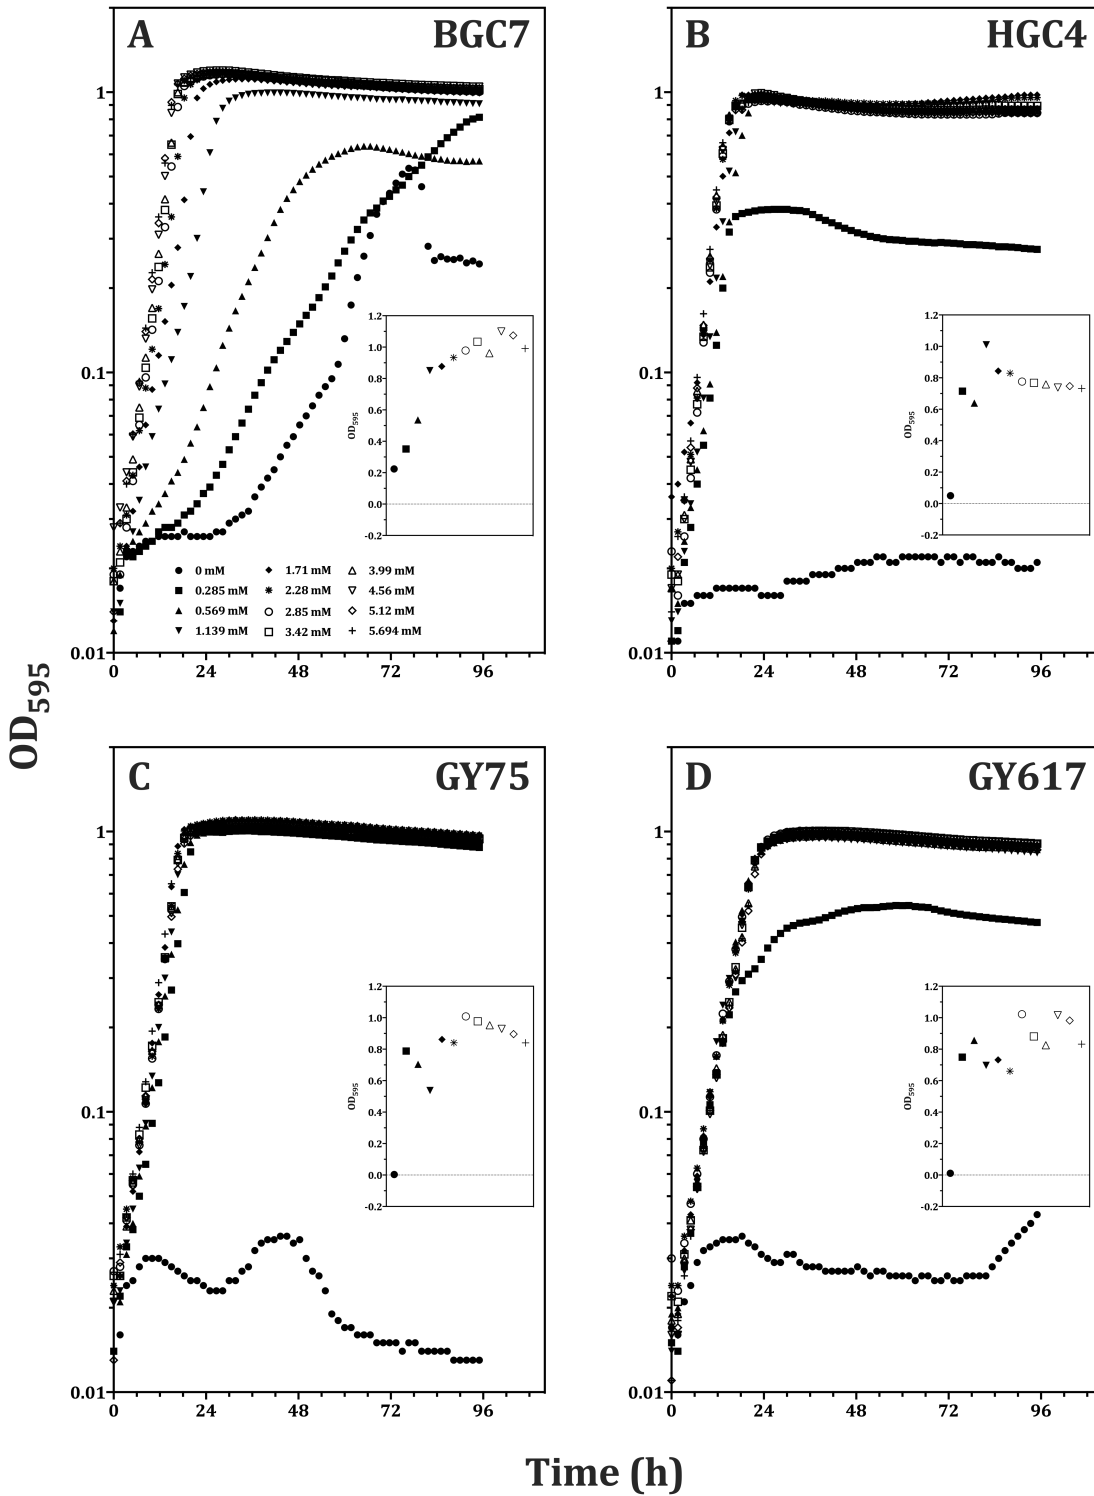

1010

1011 **Figure S3. Aerobic growth in defined medium is L-cysteine-dependent.**

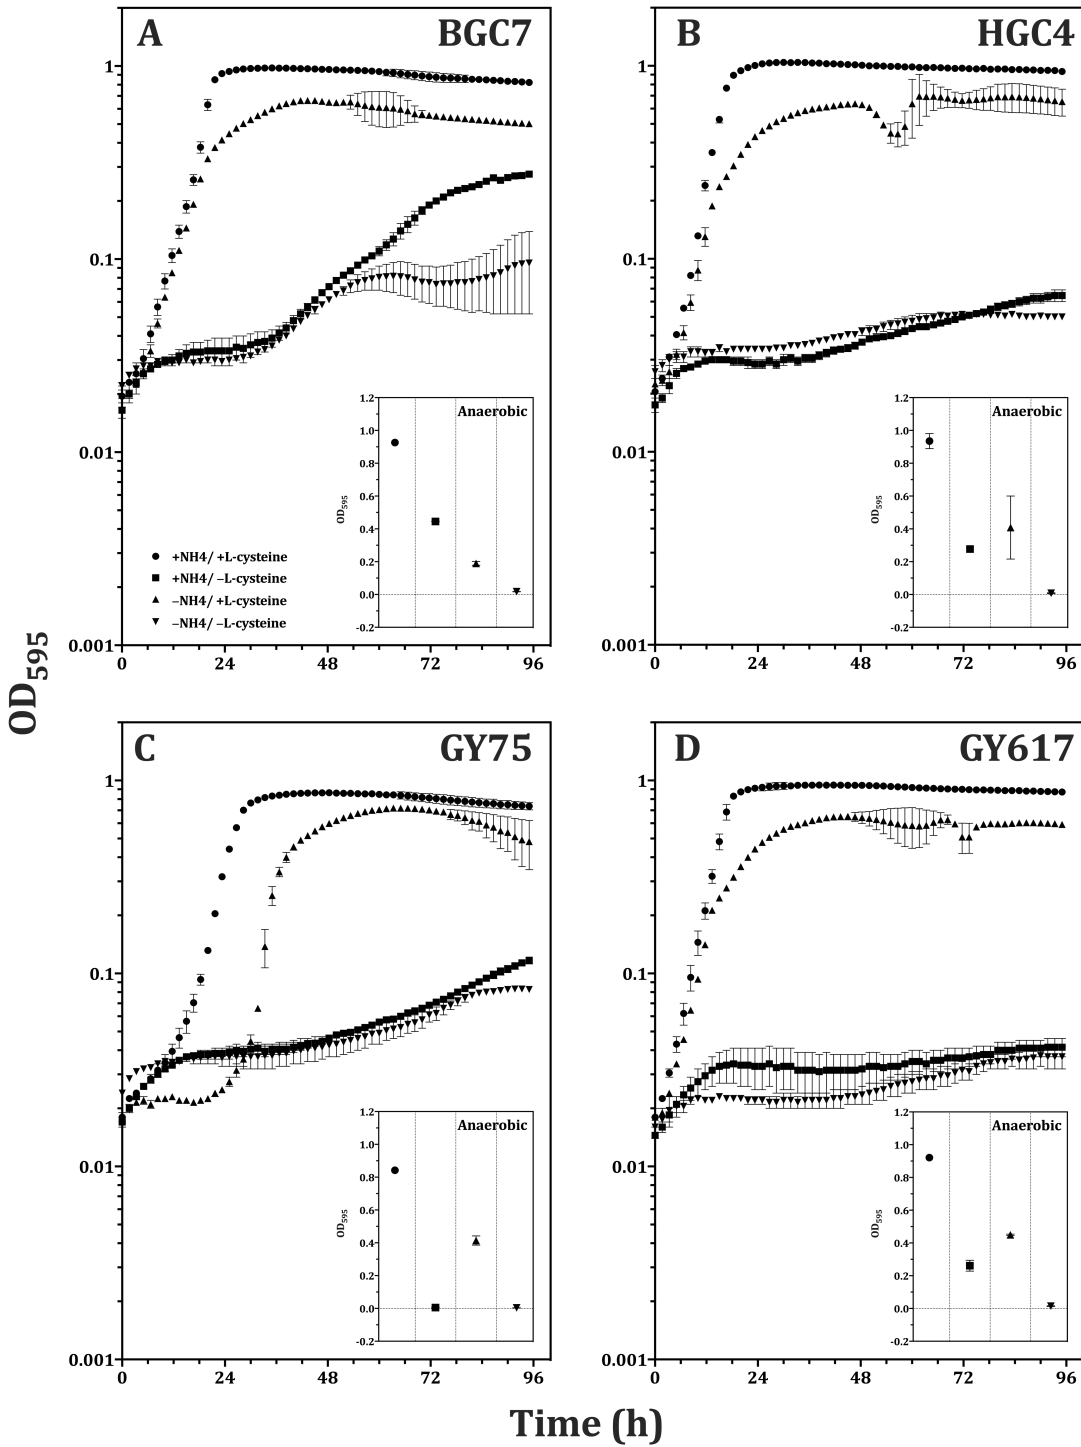

1012

1013 **Figure S4. *Dysgonomonas* can utilize L-cysteine as the sole source of nitrogen.**

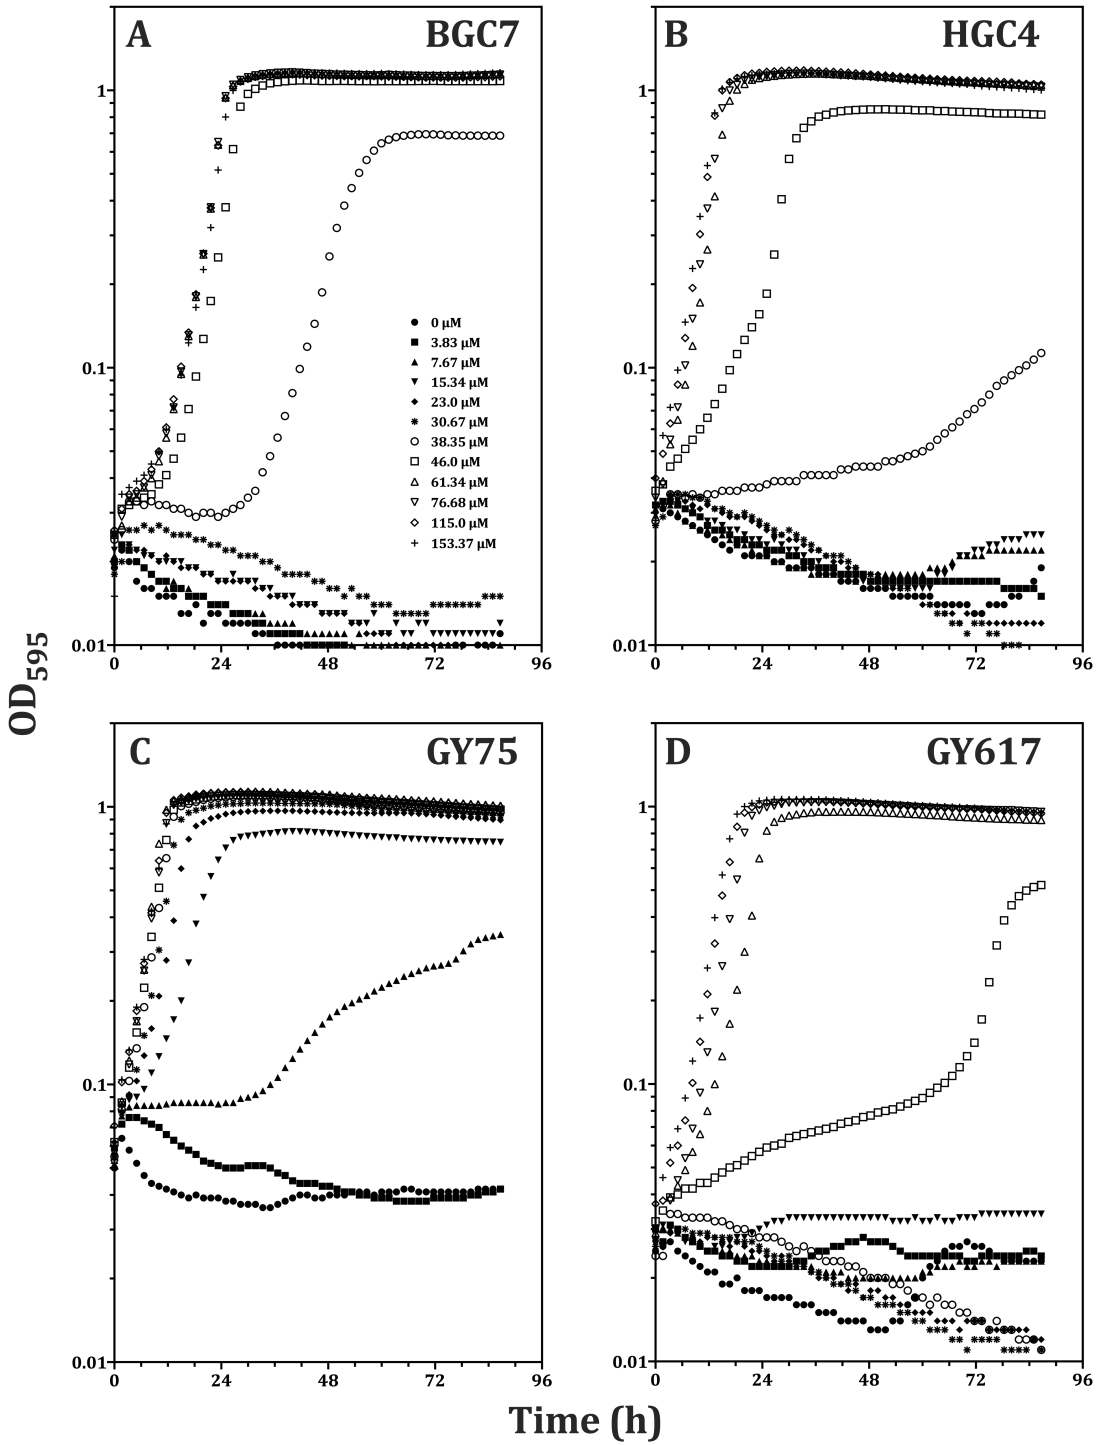

1014

1015 **Figure S5. Aerobic growth is dependent on ferric hemin concentration.**

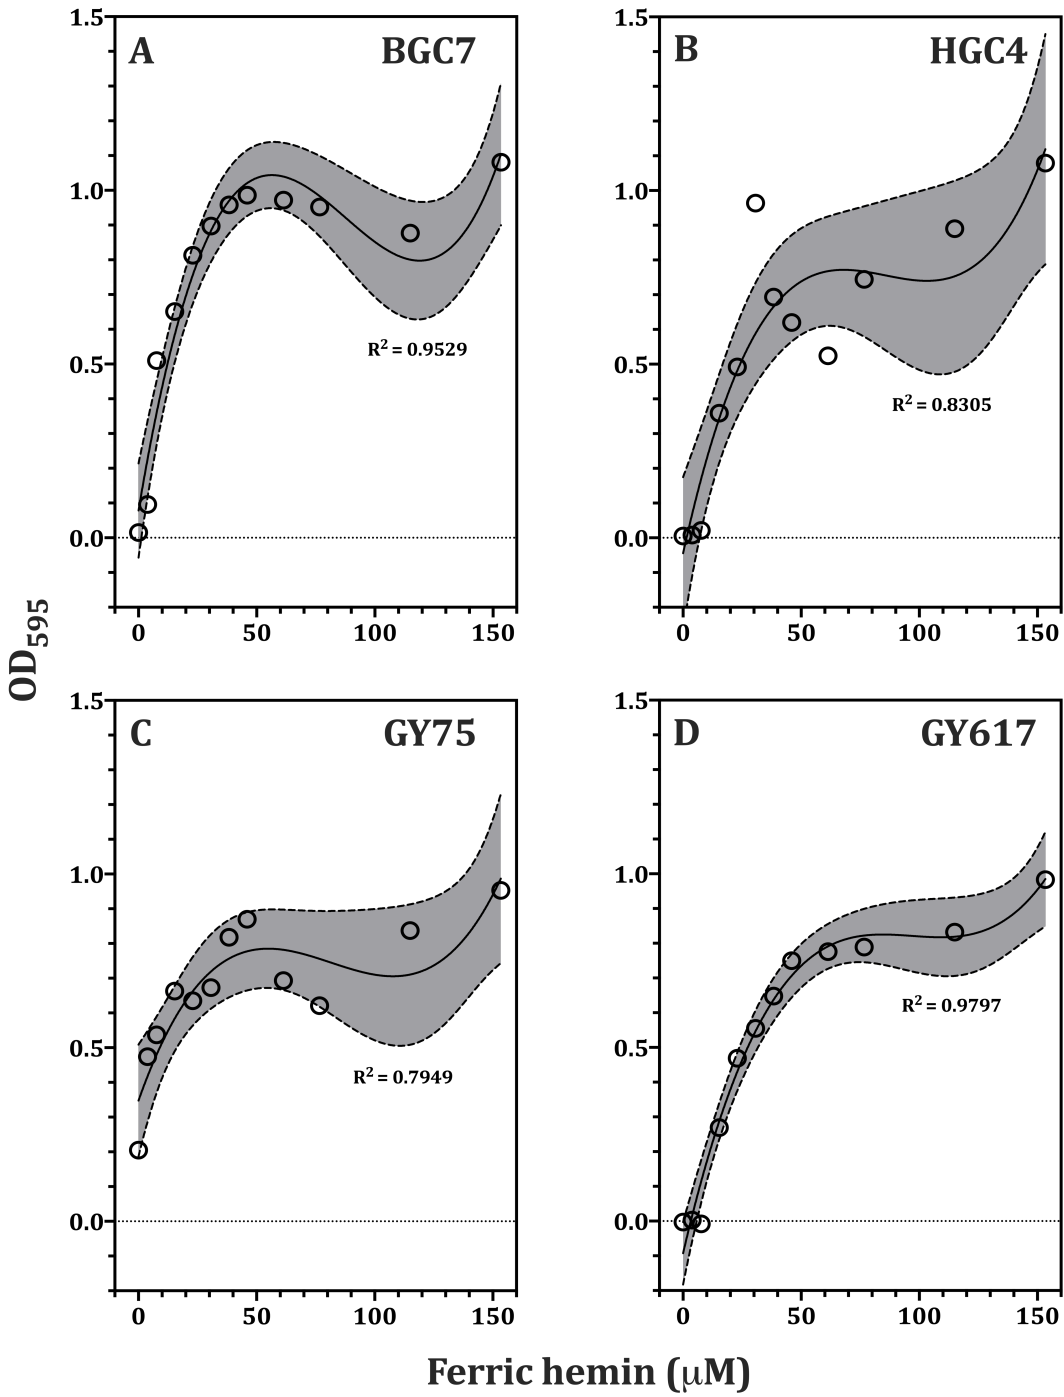

1016

1017 **Figure S6. Anaerobic growth yield is dependent on ferric hemin concentration.**

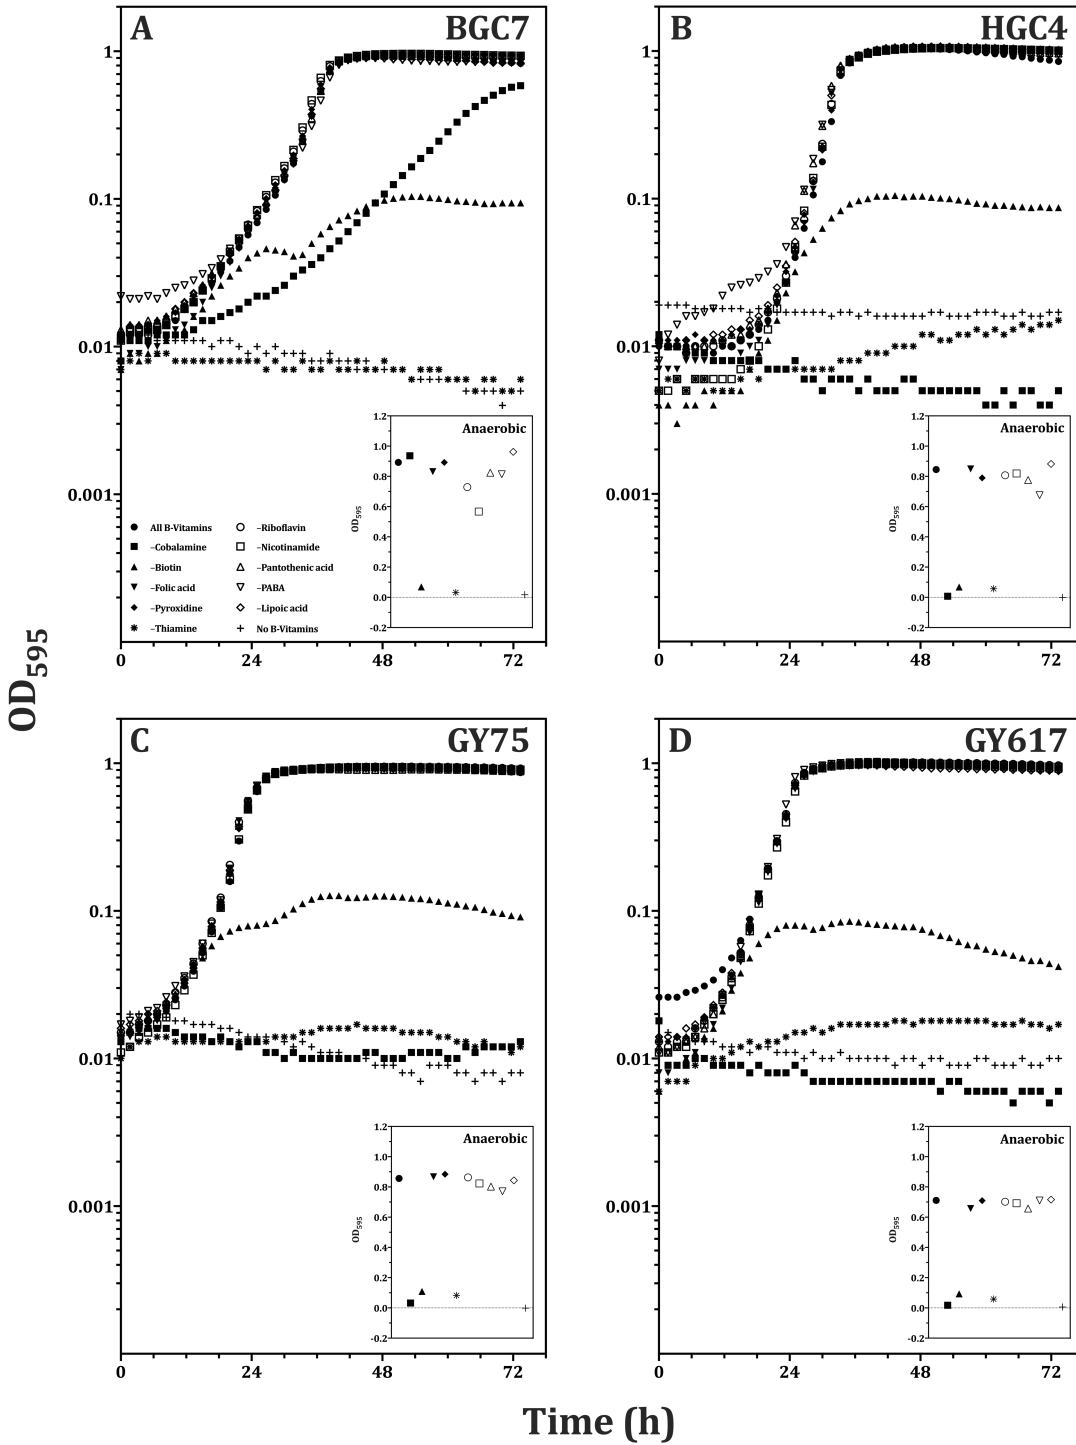

1018

1019 **Figure S7. Isolates exhibit multiple B-vitamin auxotrophies.**

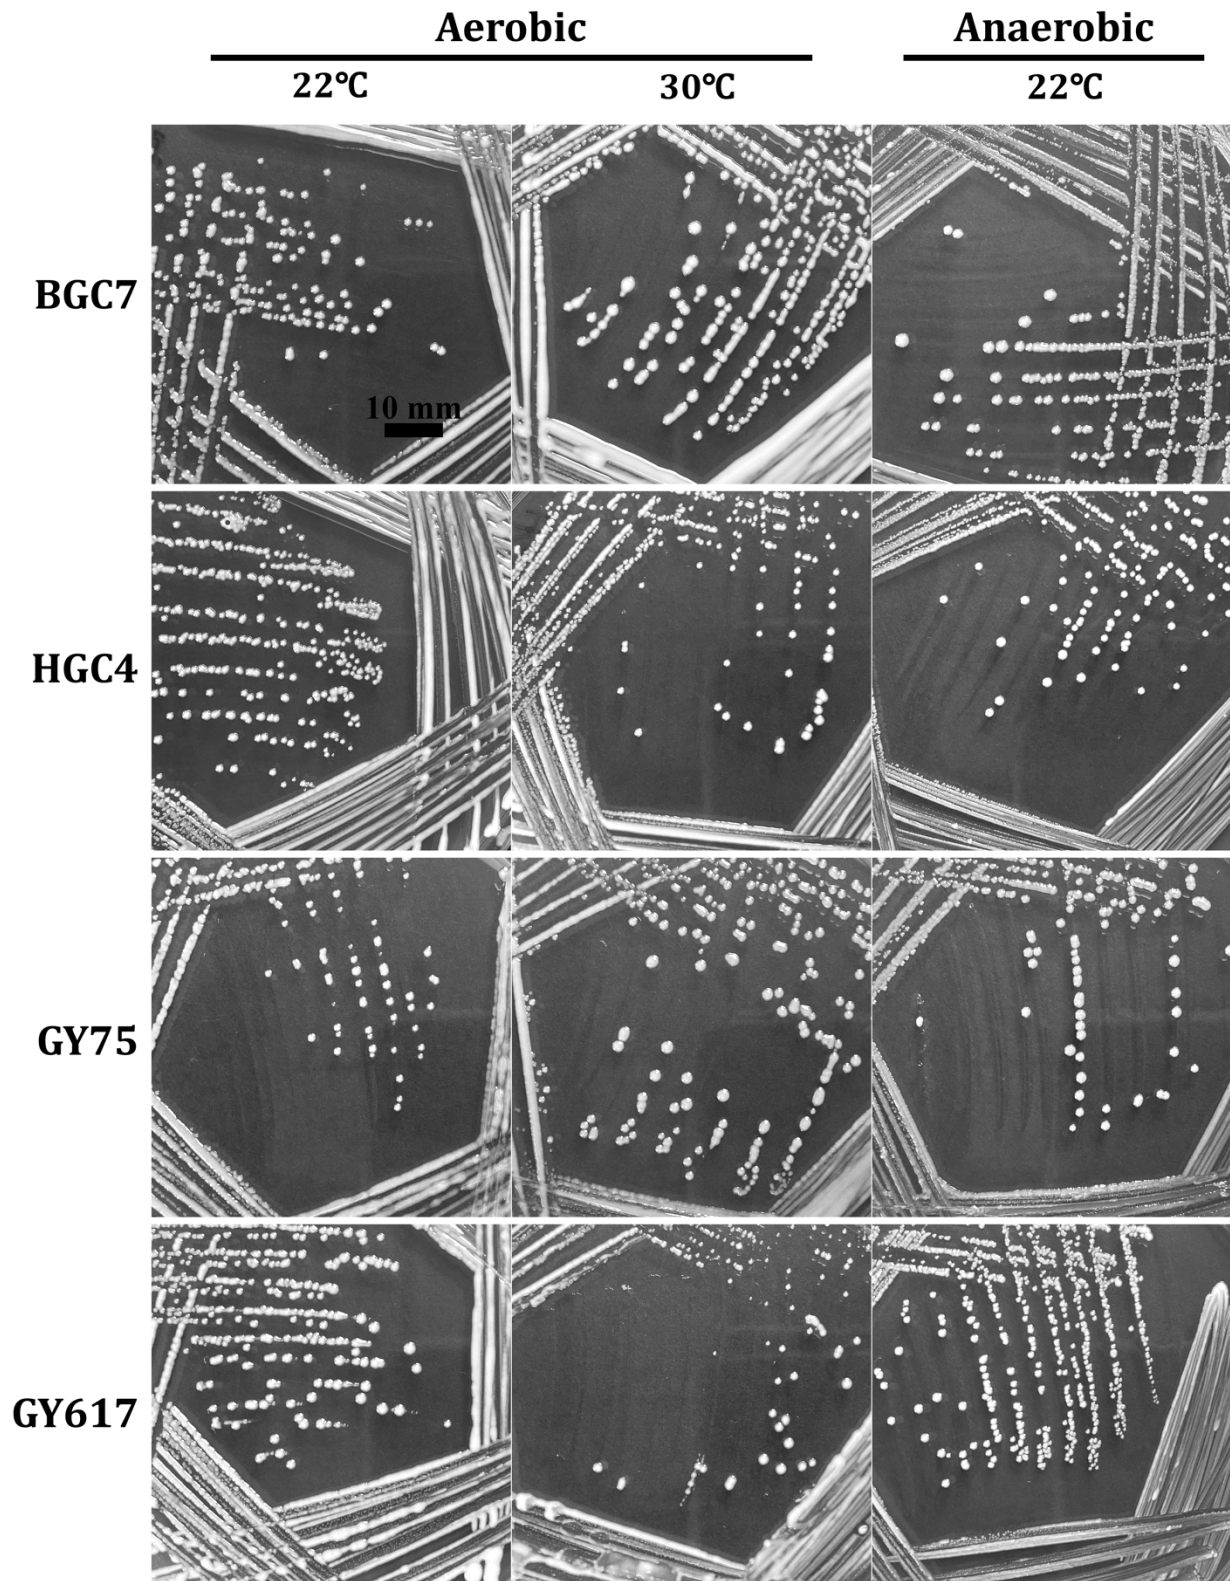

1020

1021 **Figure S8. Agar-solidified complex medium (DCM) supports growth under common**

1022 **incubation conditions.**



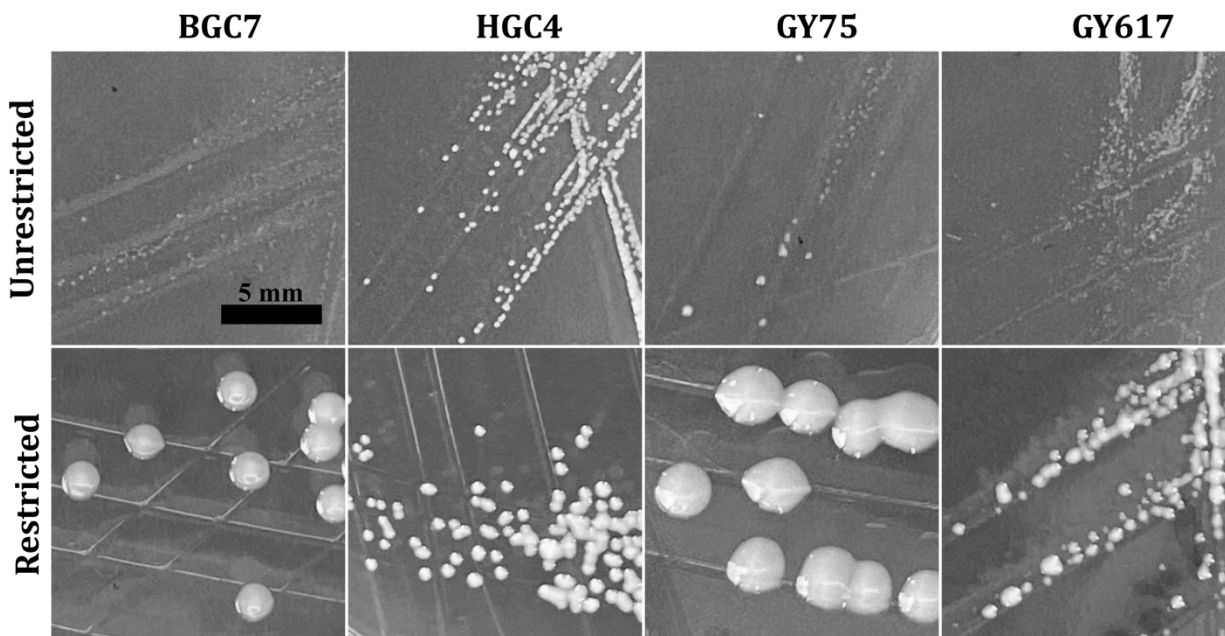

1023  
1024 **Figure S9. Incubation in atmosphere-restricted conditions promotes growth on agar-**  
1025 **solidified DMM containing antioxidants.**

## 1026 References

- 1027 [1] K.L. Ormerod, D.L.A. Wood, N. Lachner, S.L. Gellatly, J.N. Daly, J.D. Parsons, et al.,  
1028 Genomic characterization of the uncultured *Bacteroidales* family S24-7 inhabiting the  
1029 guts of homeothermic animals, *Microbiome*. 4 (2016) 36. doi:10.1186/s40168-016-  
1030 0181-2.
- 1031 [2] P.L. Wallace, D.G. Hollis, R.E. Weaver, C.W. Moss, Characterization of CDC group  
1032 DF-3 by cellular fatty acid analysis, *Journal of Clinical Microbiology*. 27 (1989) 735–  
1033 737.
- 1034 [3] T. Hofstad, I. Olsen, E.R. Eribe, E. Falsen, M.D. Collins, P.A. Lawson, *Dysgonomonas*  
1035 gen. nov. to accommodate *Dysgonomonas gadei* sp. nov., an organism isolated from a  
1036 human gall bladder, and *Dysgonomonas capnocytophagoides* (formerly CDC group  
1037 DF-3), *International Journal of Systematic and Evolutionary Microbiology*. 50 (2000)  
1038 2189–2195. doi:10.1099/00207713-50-6-2189.
- 1039 [4] P.A. Lawson, E. Falsen, E. Inganäs, R.S. Weyant, M.D. Collins, *Dysgonomonas mossii*  
1040 sp. nov., from Human Sources, *Systematic and Applied Microbiology*. 25 (2002) 194–  
1041 197. doi:10.1078/0723-2020-00107.
- 1042 [5] P.A. Lawson, P. Carlson, S. Wernersson, E.R.B. Moore, E. Falsen, *Dysgonomonas*  
1043 *hofstadii* sp. nov., isolated from a human clinical source, 16 (2010) 161–164.  
1044 doi:10.1016/j.anaerobe.2009.06.005.
- 1045 [6] M. Bilen, M.D.M. Fonkou, G. Dubourg, E. Tomei, M. Richez, J. Delerce, et al.,  
1046 *Dysgonomonas massiliensis* sp. nov., a new species isolated from the human gut and  
1047 its taxonogenomic description, *Antonie Van Leeuwenhoek*. 112 (2019) 935–945.  
1048 doi:10.1007/s10482-019-01227-1.

- 1049 [7] Y. Kodama, T. Shimoyama, K. Watanabe, *Dysgonomonas oryzaevi* sp. nov., isolated  
1050 from a microbial fuel cell, *International Journal of Systematic and Evolutionary*  
1051 *Microbiology*. 62 (2012) 3055–3059. doi:10.1099/ijms.0.039040-0.
- 1052 [8] Y.J. Yang, N. Zhang, S.Q. Ji, X. Lan, K.D. Zhang, Y.L. Shen, et al., *Dysgonomonas*  
1053 *macrotermidis* sp. nov., isolated from the hindgut of a fungus-growing termite,  
1054 *International Journal of Systematic and Evolutionary Microbiology*. 64 (2014) 2956–  
1055 2961. doi:10.1099/ijms.0.061739-0.
- 1056 [9] A.K. Pramono, M. Sakamoto, T. Iino, Y. Hongoh, M. Ohkuma, *Dysgonomonas*  
1057 *termitidis* sp. nov., isolated from the gut of the subterranean termite *Reticulitermes*  
1058 *speratus*, *International Journal of Systematic and Evolutionary Microbiology*. 65  
1059 (2015) 681–685. doi:10.1099/ijms.0.070391-0.
- 1060 [10] N. Zhou, Y.-T. Sun, D.-W. Chen, W. Du, H. Yang, S.-J. Liu, Harnessing microfluidic  
1061 streak plate technique to investigate the gut microbiome of *Reticulitermes chinensis*,  
1062 *MicrobiologyOpen*. 8 (2018) e00654. doi:10.1002/mbo3.654.
- 1063 [11] T. Aki, Y. Nakashimada, Y. Okamura, J. Kato, T. Miura, T. Tajima, et al.,  
1064 *Dysgonomonas alginatilytica* sp. nov., an alginate-degrading bacterium isolated from a  
1065 microbial consortium, *International Journal of Systematic and Evolutionary*  
1066 *Microbiology*. 65 (2015) 3570–3575. doi:10.1099/ijsem.0.000459.
- 1067 [12] J. Duan, J. Liang, Y. Wang, W. Du, D. Wang, Kraft Lignin Biodegradation by  
1068 *Dysgonomonas* sp. WJDL-Y1, a New Anaerobic Bacterial Strain Isolated from Sludge  
1069 of a Pulp and Paper Mill, *J. Microbiol. Biotechnol.* 26 (2016) 1765–1773.  
1070 doi:10.4014/jmb.1602.02014.
- 1071 [13] A. Vera-Ponce de León, B.C. Jahnes, J. Duan, L.A. Camuy-Vélez, Z.L. Sabree,  
1072 Cultivable, Host-Specific *Bacteroidetes* Symbionts Exhibit Diverse Polysaccharolytic  
1073 Strategies, *Applied and Environmental Microbiology*. 86 (2020).  
1074 doi:10.1128/AEM.00091-20.
- 1075 [14] T. Erban, O. Ledvinka, M. Kamler, B. Hortova, M. Nesvorna, J. Tyl, et al., Bacterial  
1076 community associated with worker honeybees (*Apis mellifera*) affected by European  
1077 foulbrood, *PeerJ*. 5 (2017) e3816. doi:10.7717/peerj.3816.
- 1078 [15] A.K. Gupta, D. Nayduch, P. Verma, B. Shah, H.V. Ghate, M.S. Patole, et al.,  
1079 Phylogenetic characterization of bacteria in the gut of house flies (*Musca domestica*  
1080 L.), *FEMS Microbiology Ecology*. 79 (2011) 581–593. doi:10.1111/j.1574-  
1081 6941.2011.01248.x.
- 1082 [16] C.L. Jiang, W.Z. Jin, X.H. Tao, Q. Zhang, J. Zhu, S.Y. Feng, et al., Black soldier fly  
1083 larvae (*Hermetia illucens*) strengthen the metabolic function of food waste  
1084 biodegradation by gut microbiome, *Microb. Biotechnol.* 12 (2019) 528–543.  
1085 doi:10.1111/1751-7915.13393.
- 1086 [17] J.M. Deguenon, N. Travanty, J. Zhu, A. Carr, S. Denning, M.H. Reiskind, et al.,  
1087 Exogenous and endogenous microbiomes of wild-caught *Phormia regina* (Diptera:  
1088 Calliphoridae) flies from a suburban farm by 16S rRNA gene sequencing, *Sci. Rep.* 9  
1089 (2019) 20365–13. doi:10.1038/s41598-019-56733-z.
- 1090 [18] T. Klammsteiner, A. Walter, T. Bogataj, C.D. Heussler, B. Stres, F.M. Steiner, et al.,  
1091 The Core Gut Microbiome of Black Soldier Fly (*Hermetia illucens*) Larvae Raised on  
1092 Low-Bioburden Diets, *Front. Microbio.* 11 (2020) 993. doi:10.3389/fmicb.2020.00993.
- 1093 [19] J.A. Chandler, J. Morgan Lang, S. Bhatnagar, J.A. Eisen, A. Kopp, Bacterial  
1094 Communities of Diverse *Drosophila* Species: Ecological Context of a Host–Microbe

- 1095 Model System, PLoS Genet. 7 (2011) e1002272–18.  
1096 doi:10.1371/journal.pgen.1002272.
- 1097 [20] V.G. Martinson, J. Carpinteyro-Ponce, N.A. Moran, T.A. Markow, A Distinctive and  
1098 Host-Restricted Gut Microbiota in Populations of a Cactophilic *Drosophila* Species,  
1099 Applied and Environmental Microbiology. 83 (2017) 12974–10.  
1100 doi:10.1128/AEM.01551-17.
- 1101 [21] K. Poff, H. Stever, J. Reil, P. Seabourn, A. Ching, S. Aoki, et al., The Native Hawaiian  
1102 Insect Microbiome Initiative: A Critical Perspective for Hawaiian Insect Evolution,  
1103 Insects. 8 (2017) 130–14. doi:10.3390/insects8040130.
- 1104 [22] M. Tagliavia, E. Messina, B. Manachini, S. Cappello, P. Quatrini, The gut microbiota  
1105 of larvae of *Rhynchophorus ferrugineus* Oliver (Coleoptera: Curculionidae), BMC  
1106 Microbiol. 14 (2014) 136–11. doi:10.1186/1471-2180-14-136.
- 1107 [23] P.Z.N. Franzini, J.-B. Ramond, C.H. Scholtz, C.L. Sole, S. Ronca, D.A. Cowan, The  
1108 Gut Microbiomes of Two *Pachysoma* MacLeay Desert Dung Beetle Species  
1109 (Coleoptera: Scarabaeidae: Scarabaeinae) Feeding on Different Diets, PLoS ONE. 11  
1110 (2016) e0161118–19. doi:10.1371/journal.pone.0161118.
- 1111 [24] S.P. Shukla, C. Plata, M. Reichelt, S. Steiger, D.G. Heckel, M. Kaltenpoth, et al.,  
1112 Microbiome-assisted carrion preservation aids larval development in a burying beetle,  
1113 Proc Natl Acad Sci U S A. 115 (2018) 11274–11279. doi:10.1073/pnas.1812808115.
- 1114 [25] C. Luo, Y. Li, Y. Chen, C. Fu, W. Long, X. Xiao, et al., Bamboo lignocellulose  
1115 degradation by gut symbiotic microbiota of the bamboo snout beetle *Cyrtotrachelus*  
1116 *buqueti*, Biotechnol Biofuels. 12 (2019) 70. doi:10.1186/s13068-019-1411-1.
- 1117 [26] E.S. Parker, I.L.G. Newton, A.P. Moczek, (My Microbiome) Would Walk 10,000  
1118 miles: Maintenance and Turnover of Microbial Communities in Introduced Dung  
1119 Beetles, (2020) 1–12. doi:10.1007/s00248-020-01514-9.
- 1120 [27] D. Duguma, P. Rugman-Jones, M.G. Kaufman, M.W. Hall, J.D. Neufeld, R.  
1121 Stouthamer, et al., Bacterial Communities Associated with *Culex* Mosquito Larvae and  
1122 Two Emergent Aquatic Plants of Bioremediation Importance, PLoS ONE. 8 (2013)  
1123 e72522–11. doi:10.1371/journal.pone.0072522.
- 1124 [28] D. Duguma, M.W. Hall, P. Rugman-Jones, R. Stouthamer, O. Terenius, J.D. Neufeld,  
1125 et al., Developmental succession of the microbiome of *Culex* mosquitoes, BMC  
1126 Microbiol. (2015) 1–13. doi:10.1186/s12866-015-0475-8.
- 1127 [29] G. Minard, F.-H. Tran, A. Dubost, V. Tran Van, P. Mavingui, C.V. Moro,  
1128 Pyrosequencing 16S rRNA genes of bacteria associated with wild tiger mosquito  
1129 *Aedes albopictus*: a pilot study, Front. Cell. Infect. Microbiol. 4 (2014) 59.  
1130 doi:10.3389/fcimb.2014.00059.
- 1131 [30] G. Minard, F.H. Tran, V.T. Van, C. Goubert, C. Bellet, G. Lambert, et al., French  
1132 invasive Asian tiger mosquito populations harbor reduced bacterial microbiota and  
1133 genetic diversity compared to Vietnamese autochthonous relatives, Front. Microbio. 6  
1134 (2015) e2836–15. doi:10.3389/fmicb.2015.00970.
- 1135 [31] A. Rani, A. Sharma, R. Rajagopal, T. Adak, R.K. Bhatnagar, Bacterial diversity  
1136 analysis of larvae and adult midgut micro-flora using culture-dependent and culture-  
1137 independent methods in lab-reared and field-collected *Anopheles stephensi*-an Asian  
1138 malarial vector, BMC Microbiol. 9 (2009) 96–22. doi:10.1186/1471-2180-9-96.
- 1139 [32] G. Gimonneau, M.T. Tchioffo, L. Abate, A. Boissière, P.H. Awono-Ambéné, S.E.  
1140 Nsango, et al., Composition of *Anopheles coluzzii* and *Anopheles gambiae* microbiota

- 1141 from larval to adult stages, *Infection, Genetics and Evolution*. 28 (2014) 715–724.  
1142 doi:10.1016/j.meegid.2014.09.029.
- 1143 [33] C. Schauer, C.L. Thompson, A. Brune, The bacterial community in the gut of the  
1144 Cockroach *Shelfordella lateralis* reflects the close evolutionary relatedness of  
1145 cockroaches and termites, *Applied and Environmental Microbiology*. 78 (2012) 2758–  
1146 2767. doi:10.1128/AEM.07788-11.
- 1147 [34] C. Dietrich, T. Kohler, A. Brune, The Cockroach Origin of the Termite Gut  
1148 Microbiota: Patterns in Bacterial Community Structure Reflect Major Evolutionary  
1149 Events, *Applied and Environmental Microbiology*. 80 (2014) 2261–2269.  
1150 doi:10.1128/AEM.04206-13.
- 1151 [35] M. Berlanga, C. Llorens, J. Comas, R. Guerrero, Gut Bacterial Community of the  
1152 Xylophagous Cockroaches *Cryptocercus punctulatus* and *Parasphaeria boleiriana*,  
1153 PLoS ONE. 11 (2016). doi:10.1371/journal.pone.0152400.
- 1154 [36] A. Mikaelyan, C.L. Thompson, M.J. Hofer, A. Brune, Deterministic Assembly of  
1155 Complex Bacterial Communities in Guts of Germ-Free Cockroaches, *Applied and  
1156 Environmental Microbiology*. 82 (2016) 1256–1263. doi:10.1128/AEM.03700-15.
- 1157 [37] P. Vd'ačný, E. Érseková, K. Šoltys, J. Budiš, L. Pecina, I. Rurik, Co-existence of  
1158 multiple bacterivorous clevelandellid ciliate species in hindgut of wood-feeding  
1159 cockroaches in light of their prokaryotic consortium, *Sci. Rep.* 8 (2018) 17749.  
1160 doi:10.1038/s41598-018-36245-y.
- 1161 [38] N. Lampert, A. Mikaelyan, A. Brune, Diet is not the primary driver of bacterial  
1162 community structure in the gut of litter-feeding cockroaches, *BMC Microbiol.* 19  
1163 (2019) 238–14. doi:10.1186/s12866-019-1601-9.
- 1164 [39] T. Murakami, S. Onouchi, K. Igai, M. Ohkuma, Y. Hongoh, Ectosymbiotic bacterial  
1165 microbiota densely colonize the surface of thelastomatid nematodes in the gut of the  
1166 wood-feeding cockroach *Panesthia angustipennis*, *FEMS Microbiology Ecology*. 95  
1167 (2019). doi:10.1093/femsec/fiy238.
- 1168 [40] H. Nakajima, Y. Hongoh, R. Usami, T. Kudo, M. Ohkuma, Spatial distribution of  
1169 bacterial phylotypes in the gut of the termite *Reticulitermes speratus* and the bacterial  
1170 community colonizing the gut epithelium, *FEMS Microbiology Ecology*. 54 (2005)  
1171 247–255. doi:10.1016/j.femsec.2005.03.010.
- 1172 [41] H. Yang, D. Schmitt-Wagner, U. Stingl, A. Brune, Niche heterogeneity determines  
1173 bacterial community structure in the termite gut (*Reticulitermes santonensis*), *Environ  
1174 Microbiol.* 7 (2005) 916–932. doi:10.1111/j.1462-2920.2005.00760.x.
- 1175 [42] S. Noda, O. Kitade, T. Inoue, M. Kawai, M. Kanuka, K. Hiroshima, et al.,  
1176 Cospeciation in the triplex symbiosis of termite gut protists (*Pseudotrichonympha  
1177 spp.*), their hosts, and their bacterial endosymbionts, *Molecular Ecology*. 16 (2007)  
1178 1257–1266. doi:10.1111/j.1365-294X.2006.03219.x.
- 1179 [43] H.M. Makonde, R. Mwirichia, Z. Osiemo, H.I. Boga, H.-P. Klenk, 454  
1180 Pyrosequencing-based assessment of bacterial diversity and community structure in  
1181 termite guts, mounds and surrounding soils, *Springerplus*. 4 (2015) 471.  
1182 doi:10.1186/s40064-015-1262-6.
- 1183 [44] L. Su, L. Yang, S. Huang, X. Su, Y. Li, F. Wang, et al., Comparative Gut Microbiomes  
1184 of Four Species Representing the Higher and the Lower Termites, *J. Insect Sci.* 16  
1185 (2016) 97–9. doi:10.1093/jisesa/iew081.



- 1186 [45] S. Otani, A. Mikaelyan, T. Nobre, L.H. Hansen, N.A. Koné, S.J. Sørensen, et al.,  
1187 Identifying the core microbial community in the gut of fungus-growing termites,  
1188 *Molecular Ecology*. 23 (2014) 4631–4644. doi:10.1111/mec.12874.
- 1189 [46] M. Berlanga, M. Palau, R. Guerrero, Gut microbiota dynamics and functionality in  
1190 *Reticulitermes grassei* after a 7-day dietary shift and ciprofloxacin treatment, *PLoS*  
1191 *ONE*. 13 (2018) e0209789. doi:10.1371/journal.pone.0209789.
- 1192 [47] J. Benjamino, J. Graf, Characterization of the Core and Caste-Specific Microbiota in  
1193 the Termite, *Reticulitermes flavipes*, *Front. Microbio.* 7 (2016) 171.  
1194 doi:10.3389/fmicb.2016.00171.
- 1195 [48] L. Auer, A. Lazuka, D. Sillam-Dussès, E. Miambi, M. O'Donohue, G. Hernandez-  
1196 Raquet, Uncovering the Potential of Termite Gut Microbiome for Lignocellulose  
1197 Bioconversion in Anaerobic Batch Bioreactors, *Front. Microbio.* 8 (2017) 2623.  
1198 doi:10.3389/fmicb.2017.02623.
- 1199 [49] L.A. Soares, C.A.B. Silva Rabelo, I.K. Sakamoto, E.L. Silva, M.B.A. Varesche,  
1200 Screening and Bioprospecting of Anaerobic Consortia for Biofuel Production  
1201 Enhancement from Sugarcane Bagasse, *Appl Biochem Biotechnol.* 190 (2020) 232–  
1202 251. doi:10.1007/s12010-019-03074-2.
- 1203 [50] Y. Zhang, B. Min, L. Huang, I. Angelidaki, Generation of Electricity and Analysis of  
1204 Microbial Communities in Wheat Straw Biomass-Powered Microbial Fuel Cells,  
1205 *Applied and Environmental Microbiology*. 75 (2009) 3389–3395.  
1206 doi:10.1128/AEM.02240-08.
- 1207 [51] L. Lu, D. Xing, N. Ren, B.E. Logan, Syntrophic interactions drive the hydrogen  
1208 production from glucose at low temperature in microbial electrolysis cells, *Bioresource*  
1209 *Technology*. 124 (2012) 68–76. doi:10.1016/j.biortech.2012.08.040.
- 1210 [52] A. Yamamuro, A. Kouzuma, T. Abe, K. Watanabe, Metagenomic analyses reveal the  
1211 involvement of syntrophic consortia in methanol/electricity conversion in microbial  
1212 fuel cells, *PLoS ONE*. 9 (2014) e98425. doi:10.1371/journal.pone.0098425.
- 1213 [53] L. Hao, B. Zhang, M. Cheng, C. Feng, Effects of various organic carbon sources on  
1214 simultaneous V(V) reduction and bioelectricity generation in single chamber microbial  
1215 fuel cells, *Bioresource Technology*. 201 (2016) 105–110.  
1216 doi:10.1016/j.biortech.2015.11.060.
- 1217 [54] S. Zhang, J. You, N. An, J. Zhao, L. Wang, Z. Cheng, et al., Gaseous toluene powered  
1218 microbial fuel cell: Performance, microbial community, and electron transfer pathway,  
1219 *Chemical Engineering Journal*. 351 (2018) 515–522. doi:10.1016/j.cej.2018.06.027.
- 1220 [55] B.S. Zakaria, L. Lin, B.R. Dhar, Shift of biofilm and suspended bacterial communities  
1221 with changes in anode potential in a microbial electrolysis cell treating primary sludge,  
1222 *Science of the Total Environment*. 689 (2019) 1–9.  
1223 doi:10.1016/j.scitotenv.2019.06.519.
- 1224 [56] B.S. Zakaria, B.R. Dhar, Changes in syntrophic microbial communities, EPS matrix,  
1225 and gene-expression patterns in biofilm anode in response to silver nanoparticles  
1226 exposure, *Sci. Total Environ.* 734 (2020) 139395.  
1227 doi:10.1016/j.scitotenv.2020.139395.
- 1228 [57] Y. Ren, Y. Lv, Y. Wang, X. Li, Effect of heterotrophic anodic denitrification on  
1229 anolyte pH control and bioelectricity generation enhancement of bufferless microbial  
1230 fuel cells, *Chemosphere*. 257 (2020) 127251. doi:10.1016/j.chemosphere.2020.127251.

- 1231 [58] X. Wang, D. Xing, X. Mei, B. Liu, N. Ren, Glucose and Applied Voltage Accelerated  
1232 p-Nitrophenol Reduction in Biocathode of Bioelectrochemical Systems, *Front.*  
1233 *Microbio.* 9 (2018) 580. doi:10.3389/fmicb.2018.00580.
- 1234 [59] J. Li, M.-H. Cai, Y. Miao, G. Luo, W.-T. Li, Y. Li, et al., Bacterial community  
1235 structure and predicted function in an acidogenic sulfate-reducing reactor: Effect of  
1236 organic carbon to sulfate ratios, *Bioresource Technology.* 293 (2019) 122020.  
1237 doi:10.1016/j.biortech.2019.122020.
- 1238 [60] Z. Xiong, A. Hussain, J. Lee, H.-S. Lee, Food waste fermentation in a leach bed  
1239 reactor: Reactor performance, and microbial ecology and dynamics, *Bioresource*  
1240 *Technology.* 274 (2019) 153–161. doi:10.1016/j.biortech.2018.11.066.
- 1241 [61] X. Xu, W. Zhang, X. Gu, Z. Guo, J. Song, D. Zhu, et al., Stabilizing lactate production  
1242 through repeated batch fermentation of food waste and waste activated sludge,  
1243 *Bioresource Technology.* 300 (2020) 122709. doi:10.1016/j.biortech.2019.122709.
- 1244 [62] E. Zhang, Q. Yu, W. Zhai, F. Wang, K. Scott, High tolerance of and removal of  
1245 cefazolin sodium in single-chamber microbial fuel cells operation, *Bioresource*  
1246 *Technology.* 249 (2018) 76–81. doi:10.1016/j.biortech.2017.10.005.
- 1247 [63] M. Martins, S. Sanches, I.A.C. Pereira, Anaerobic biodegradation of pharmaceutical  
1248 compounds\_ New insights into the pharmaceutical-degrading bacteria, *Journal of*  
1249 *Hazardous Materials.* 357 (2018) 289–297. doi:10.1016/j.jhazmat.2018.06.001.
- 1250 [64] S. Li, T. Hua, C.-S. Yuan, B. Li, X. Zhu, F. Li, Degradation pathways, microbial  
1251 community and electricity properties analysis of antibiotic sulfamethoxazole by bio-  
1252 electro-Fenton system, *Bioresource Technology.* 298 (2020) 122501.  
1253 doi:10.1016/j.biortech.2019.122501.
- 1254 [65] M.G. de Melo Oliveira, S. Abels, R. Zbinden, G.V. Bloemberg, A. Zbinden, Accurate  
1255 identification of fastidious Gram-negative rods: integration of both conventional  
1256 phenotypic methods and 16S rRNA gene analysis, *BMC Microbiol.* 13 (2013) 162.  
1257 doi:10.1186/1471-2180-13-162.
- 1258 [66] M.A. Oberhardt, R. Zarecki, S. Gronow, E. Lang, H.-P. Klenk, U. Gophna, et al.,  
1259 Harnessing the landscape of microbial culture media to predict new organism-media  
1260 pairings, *Nature Communications.* 6 (2015) 8493. doi:10.1038/ncomms9493.
- 1261 [67] V.H. Varel, M.P. Bryant, Nutritional features of *Bacteroides fragilis* subsp. *fragilis*,  
1262 *Appl Microbiol.* 28 (1974) 251–257.
- 1263 [68] E.C. Martens, H.C. Chiang, J.I. Gordon, Mucosal glycan foraging enhances fitness and  
1264 transmission of a saccharolytic human gut bacterial symbiont, *Cell Host & Microbe.* 4  
1265 (2008) 447–457. doi:10.1016/j.chom.2008.09.007.
- 1266 [69] J. Larsbrink, T.E. Rogers, G.R. Hemsworth, L.S. McKee, A.S. Tazuin, O. Spadiut, et  
1267 al., A discrete genetic locus confers xyloglucan metabolism in select human gut  
1268 Bacteroidetes, *Nature Publishing Group.* 506 (2014) 498–502.  
1269 doi:10.1038/nature12907.
- 1270 [70] S.V. Seddon, H.N. Shah, J.M. Hardie, J. Robinson, Chemically defined and minimal  
1271 media for *Bacteroides gingivalis*, *Curr Microbiol.* 17 (1988) 147–149.
- 1272 [71] P. Milner, J.E. Batten, M.A. Curtis, Development of a simple chemically defined  
1273 medium for *Porphyromonas gingivalis*: requirement for alpha-ketoglutarate, *FEMS*  
1274 *Microbiology Letters.* 140 (1996) 125–130. doi:10.1111/j.1574-6968.1996.tb08325.x.



- 1275 [72] J. Duan, X. Huo, W.J. Du, J.D. Liang, D.Q. Wang, S.C. Yang, Biodegradation of kraft  
1276 lignin by a newly isolated anaerobic bacterial strain, *Acetoanaerobium* sp. WJDL-Y2,  
1277 Letters in Applied Microbiology. 62 (2016) 55–62. doi:10.1111/lam.12508.
- 1278 [73] E. Matson, E. Ottesen, J. Leadbetter, Extracting DNA from the gut microbes of the  
1279 termite (*Zootermopsis nevadensis*), JoVE. (2007) 195. doi:10.3791/195.
- 1280 [74] R.M. Atlas, Handbook of Microbiological Media, CRC Press, 2010.  
1281 doi:10.1201/EBK1439804063.
- 1282 [75] W.G. Weisburg, S.M. Barns, D.A. Pelletier, D.J. Lane, 16S ribosomal DNA  
1283 amplification for phylogenetic study, Journal of Bacteriology. 173 (1991) 697–703.  
1284 doi:10.1128/jb.173.2.697-703.1991.
- 1285 [76] R. Holliday, A New Method for the Identification of Biochemical Mutants of Micro-  
1286 organisms, Nature Publishing Group. 178 (1956) 987–987. doi:10.1038/178987a0.
- 1287 [77] R Core Team, R: A Language and Environment for Statistical Computing, Vienna,  
1288 Austria, 2020. <https://www.R-project.org/>.
- 1289 [78] K. Sprouffske, A. Wagner, Growthcurver: an R package for obtaining interpretable  
1290 metrics from microbial growth curves, BMC Bioinformatics. 17 (2016) 172.  
1291 doi:10.1186/s12859-016-1016-7.
- 1292 [79] N. Dione, S. Khelaifia, B. La Scola, J.C. Lagier, D. Raoult, A quasi-universal medium  
1293 to break the aerobic/anaerobic bacterial culture dichotomy in clinical microbiology,  
1294 European Society of Clinical Infectious Diseases. 22 (2016) 53–58.  
1295 doi:10.1016/j.cmi.2015.10.032.
- 1296 [80] J.J. Kozich, S.L. Westcott, N.T. Baxter, S.K. Highlander, P.D. Schloss, Development  
1297 of a Dual-Index Sequencing Strategy and Curation Pipeline for Analyzing Amplicon  
1298 Sequence Data on the MiSeq Illumina Sequencing Platform, Applied and  
1299 Environmental Microbiology. 79 (2013) 5112–5120. doi:10.1128/AEM.01043-13.
- 1300 [81] B.J. Callahan, P.J. McMurdie, M.J. Rosen, A.W. Han, A.J.A. Johnson, S.P. Holmes,  
1301 DADA2: High-resolution sample inference from Illumina amplicon data, Nat Meth. 13  
1302 (2016) 581–583. doi:10.1038/nmeth.3869.
- 1303 [82] B.J. Callahan, P.J. McMurdie, S.P. Holmes, Exact sequence variants should replace  
1304 operational taxonomic units in marker-gene data analysis, The ISME Journal. 11  
1305 (2017) 2639–2643. doi:10.1038/ismej.2017.119.
- 1306 [83] C. Quast, E. Pruesse, P. Yilmaz, J. Gerken, T. Schweer, P. Yarza, et al., The SILVA  
1307 ribosomal RNA gene database project: improved data processing and web-based tools,  
1308 Nucleic Acids Research. 41 (2013) D590–6. doi:10.1093/nar/gks1219.
- 1309 [84] L.-T. Nguyen, H.A. Schmidt, A. von Haeseler, B.Q. Minh, IQ-TREE: a fast and  
1310 effective stochastic algorithm for estimating maximum-likelihood phylogenies,  
1311 Molecular Biology and Evolution. 32 (2015) 268–274. doi:10.1093/molbev/msu300.
- 1312 [85] H. Wickham, R. François, L. Henry, K. Müller, dplyr: A Grammar of Data  
1313 Manipulation. R package version 0.8.5. <https://CRAN.R-project.org/package=dplyr>,  
1314 (2020).
- 1315 [86] H. Wickham, ggplot2: Elegant Graphics for Data Analysis, 2nd ed., Springer-Verlag  
1316 New York, 2016.
- 1317 [87] L.-G. Wang, T.T.-Y. Lam, S. Xu, Z. Dai, L. Zhou, T. Feng, et al., Treeio: An R  
1318 Package for Phylogenetic Tree Input and Output with Richly Annotated and  
1319 Associated Data, Molecular Biology and Evolution. 37 (2020) 599–603.  
1320 doi:10.1093/molbev/msz240.

- 1321 [88] G. Yu, Using ggtree to Visualize Data on Tree-Like Structures, *Curr Protoc*  
1322 *Bioinformatics*. 69 (2020) e96. doi:10.1002/cpbi.96.
- 1323 [89] K. Slowikowski, ggrepel: Automatically Position Non-Overlapping Text Labels with  
1324 “ggplot2.” R package version 0.8.2. <https://CRAN.R-project.org/package=ggrepel>,  
1325 (2020).
- 1326 [90] F.C. Neidhardt, P.L. Bloch, D.F. Smith, Culture medium for enterobacteria, *Journal of*  
1327 *Bacteriology*. 119 (1974) 736–747.
- 1328 [91] J.-C. Lagier, S. Edouard, I. Pagnier, O. Mediannikov, M. Drancourt, D. Raoult,  
1329 *Current and Past Strategies for Bacterial Culture in Clinical Microbiology*, 28 (2015)  
1330 208–236. doi:10.1128/CMR.00110-14.
- 1331 [92] A. Sekowska, H.F. Kung, A. Danchin, Sulfur metabolism in *Escherichia coli* and  
1332 related bacteria: facts and fiction, *J Mol Microbiol Biotechnol*. 2 (2000) 145–177.
- 1333 [93] L.L. Anzaldi, E.P. Skaar, Overcoming the heme paradox: heme toxicity and tolerance  
1334 in bacterial pathogens, *Infection and Immunity*. 78 (2010) 4977–4989.  
1335 doi:10.1128/IAI.00613-10.
- 1336 [94] E.R. Rocha, M. de Uzeda, J.H. Brock, Effect of ferric and ferrous iron chelators on  
1337 growth of *Bacteroides fragilis* under anaerobic conditions, *FEMS Microbiology*  
1338 *Letters*. 68 (1991) 45–50. doi:10.1016/0378-1097(91)90393-o.
- 1339 [95] T. Olczak, W. Simpson, X. Liu, C.A. Genco, Iron and heme utilization in  
1340 *Porphyromonas gingivalis*, *FEMS Microbiology Reviews*. 29 (2005) 119–144.  
1341 doi:10.1016/j.femsre.2004.09.001.
- 1342 [96] K.-P. Leung, S.P. Folk, Effects of porphyrins and inorganic iron on the growth of  
1343 *Prevotella intermedia*, *FEMS Microbiology Letters*. 209 (2002) 15–21.  
1344 doi:10.1111/j.1574-6968.2002.tb11103.x.
- 1345 [97] D.R. Caldwell, D.C. White, M.P. Bryant, R.N. Doetsch, Specificity of the heme  
1346 requirement for growth of *Bacteroides ruminicola*, *Journal of Bacteriology*. 90 (1965)  
1347 1645–1654.
- 1348 [98] J.M. Roper, E. Raux, A.A. Brindley, H.L. Schubert, S.E. Gharbia, H.N. Shah, et al.,  
1349 The enigma of cobalamin (Vitamin B12) biosynthesis in *Porphyromonas gingivalis*,  
1350 *Journal of Biological Chemistry*. 275 (2000) 40316–40323.  
1351 doi:10.1074/jbc.M007146200.
- 1352 [99] J.R. Roth, J.G. Lawrence, T.A. Bobik, Cobalamin (coenzyme B12): synthesis and  
1353 biological significance, *Annu. Rev. Microbiol*. 50 (1996) 137–181.  
1354 doi:10.1146/annurev.micro.50.1.137.
- 1355 [100] J. Benjamino, S. Lincoln, R. Srivastava, J. Graf, Low-abundant bacteria drive  
1356 compositional changes in the gut microbiota after dietary alteration, *Microbiome*. 6  
1357 (2018) 1–13. doi:10.1186/s40168-018-0469-5.
- 1358 [101] M.E. Stephens, D.J. Gage, Single-cell amplicon sequencing reveals community  
1359 structures and transmission trends of protist-associated bacteria in a termite host, *PLoS*  
1360 *ONE*. 15 (2020) e0233065. doi:10.1371/journal.pone.0233065.
- 1361 [102] J.S. Johnson, D.J. Spakowicz, B.-Y. Hong, L.M. Petersen, P. Demkowicz, L. Chen, et  
1362 al., Evaluation of 16S rRNA gene sequencing for species and strain-level microbiome  
1363 analysis, *Nature Communications*. 10 (2019) 5029. doi:10.1038/s41467-019-13036-1.  
1364
